# Supplementary material for: Disability pension among young women in Sweden, with special emphasis on family structure: a dynamic cohort study
Source: PubMed Central journal article supplement — BMJ Open. 2012 May 30;2(3):e000840. doi: 10.1136/bmjopen-2012-000840 (PMC3367147; doi:10.1136/bmjopen-2012-000840), 2012-05-30
Supplement: bmjopen-2012-000840.draft_revisions.pdf [file bmjopen-2012-000840.draft_revisions.pdf]

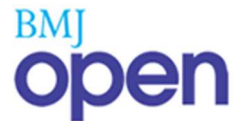

**DISABILITY PENSION AMONG YOUNG WOMEN IN SWEDEN,  
WITH SPECIAL EMPHASIS ON FAMILY STRUCTURE AND  
SICKNESS ABSENCE: A DYNAMIC COHORT STUDY**

|                                 |                                                                                                                                                                                                                                                                                                                                                                                                                                                                                                                                                                                 |
|---------------------------------|---------------------------------------------------------------------------------------------------------------------------------------------------------------------------------------------------------------------------------------------------------------------------------------------------------------------------------------------------------------------------------------------------------------------------------------------------------------------------------------------------------------------------------------------------------------------------------|
| Journal:                        | <i>BMJ Open</i>                                                                                                                                                                                                                                                                                                                                                                                                                                                                                                                                                                 |
| Manuscript ID:                  | bmjopen-2012-000840                                                                                                                                                                                                                                                                                                                                                                                                                                                                                                                                                             |
| Article Type:                   | Research                                                                                                                                                                                                                                                                                                                                                                                                                                                                                                                                                                        |
| Date Submitted by the Author:   | 16-Jan-2012                                                                                                                                                                                                                                                                                                                                                                                                                                                                                                                                                                     |
| Complete List of Authors:       | Floderus, Birgitta; Karolinska Institutet, Dpt of Clinical Neuroscience, Div. of Insurance Medicine<br>Hagman, Maud; Karolinska Institutet, Dpt of Clinical Neuroscience, Div. of Insurance Medicine<br>Aronsson, Gunnar; Stockholm University, Dpt of Psychology<br>Gustafsson, Klas; Karolinska Institutet, Dpt of Clinical Neuroscience, Div. of Insurance Medicine<br>Marklund, Staffan; Karolinska Institutet, Dpt of Clinical Neuroscience, Div. of Insurance Medicine<br>Wikman, Anders; Karolinska Institutet, Dpt of Clinical Neuroscience, Div. of Insurance Medicine |
| <b>Primary Subject Heading</b>: | Epidemiology                                                                                                                                                                                                                                                                                                                                                                                                                                                                                                                                                                    |
| Secondary Subject Heading:      | Epidemiology, Public health                                                                                                                                                                                                                                                                                                                                                                                                                                                                                                                                                     |
| Keywords:                       | Epidemiology < TROPICAL MEDICINE, PUBLIC HEALTH, Maternal medicine < OBSTETRICS                                                                                                                                                                                                                                                                                                                                                                                                                                                                                                 |
|                                 |                                                                                                                                                                                                                                                                                                                                                                                                                                                                                                                                                                                 |

SCHOLARONE™  
Manuscripts

1  
2  
3 **DISABILITY PENSION AMONG YOUNG WOMEN IN SWEDEN, WITH**  
4 **SPECIAL EMPHASIS ON FAMILY STRUCTURE AND SICKNESS ABSENCE:**  
5 **A DYNAMIC COHORT STUDY**  
6  
7  
8  
9

10  
11 Birgitta Floderus<sup>1</sup>, Maud Hagman<sup>1</sup>, Gunnar Aronsson<sup>2</sup>, Klas Gustafsson<sup>1</sup>, Staffan  
12 Marklund<sup>1</sup>, Anders Wikman<sup>1</sup>  
13

14 <sup>1</sup>Department of Clinical Neuroscience, Division of Insurance Medicine, Karolinska  
15 Institutet, Stockholm, Sweden  
16

17 <sup>2</sup>Department of Psychology, Stockholm University, Stockholm, Sweden  
18  
19

20  
21  
22  
23  
24 Corresponding author: Birgitta Floderus, Department of Clinical Neuroscience,  
25 Division of Insurance Medicine, Karolinska Institutet, S-171 77 Stockholm, Sweden,  
26 phone:+46 8 5248 3259, fax:+46 8 5248 3205  
27  
28

29  
30 Words: 3299

31  
32 Tables: 4

33  
34 Figures: 1  
35  
36

37 Subject headings: Disability pension, family structure, sickness absence, women  
38  
39

40 Running head: Disability pension among young women  
41  
42  
43  
44  
45  
46  
47  
48  
49  
50  
51  
52  
53  
54  
55  
56  
57  
58  
59  
60

Contributorship statement:

Floderus B: Contributing to conception and design, acquisition of data, analysis and interpretation of data. Drafting the article.

Hagman M: Main contributor to acquisition of data and analysis.

Aronsson G: Contributing to analysis and interpretation of data. Revising the article critically for important intellectual content.

Gustafsson K: Contributing to analysis and interpretation of data. Revising the article critically for important intellectual content.

Marklund S: Contributing to analysis and interpretation of data. Revising the article critically for important intellectual content.

Wikman A: Contributing to analysis and interpretation of data. Revising the article critically for important intellectual content.

All authors have approved of this version (2012-01-16) of the article.

## ARTICLE SUMMARY

### Article focus:

- Explanations of the increasing rate of disability pension (DP) in young women in European countries.
- High demands due to family structure and work was expected to be a contributing factor.
- A clear relation between DP and illness, measured by medically certified sickness absence was anticipated.

### Key messages:

- Parenthood contributed to an increased risk of going on DP among young women. Lone working women with children had an increased risk of DP in both a one- and five-year perspective. Cohabiting working women with children had a lower risk of DP than other cohabiting women in a one-year perspective, while the opposite was shown in a five-year follow-up.
- The number of children among working women tended to increase the risk of DP five years later.
- Medically certified long-term sickness absence was an exceptionally strong predictor of going on DP irrespective of age, demographic, and socioeconomic status.

### Strengths:

- High representativity due to the population based study group and high statistical precision due to the study size.

- 1  
2  
3 • The possibility to utilize different time spans of follow-up and to adapt to  
4 changes in the exposure and confounding factors during follow up.  
5  
6  
7

8 **Limitations:**  
9

- 10  
11 • Lack of information on the diagnoses of disability pension.  
12  
13 • Lack of information on full time or part-time work.  
14  
15 • The generalizability is restricted to countries with a welfare system similar to  
16 that of Sweden, although the knowledge could also be a pointer for other  
17 countries developing or changing their welfare system.  
18  
19 • A similar study based on men is warranted.  
20  
21  
22  
23  
24  
25  
26  
27

28 **DATA SHARING STATEMENT**  
29

30 In principle, data from the Swedish national registries are available to anyone within or  
31 outside the country who can present valid research funding and ethical approval of the  
32 research. Questions can be addressed to Statistics Sweden.  
33  
34  
35  
36  
37  
38  
39  
40  
41  
42  
43  
44  
45  
46  
47  
48  
49  
50  
51  
52  
53  
54  
55  
56  
57  
58  
59  
60

**ABSTRACT**

**Objectives:** The influence of family structure on the risk of going on disability pension (DP) was investigated among young women by analyzing its short- and long-term effect, controlling for potential confounding and the “healthy mother effect.” Further, the relation between medically certified sickness absence and DP was explored.

**Design and Participants:** This dynamic cohort study comprised all women born in Sweden between 1960 and 1979 (1.2 million), 20–43 years of age during follow-up. Their annual data were retrieved from national registers for the years 1993–2003. For this period, data on family structure, sickness absence, and potential confounders were related to the incidence of DP one year after the exposure assessment. Using a modified version of the COX proportional hazard regression, we took into account changes in the study variables of individuals over the years. In addition, a five-year follow up was used.

**Results:** Cohabiting working women with children ran a decreased risk of DP compared to other cohabiting working women in the one-year follow up, while the opposite was indicated in the five-year follow up. Lone working women with children showed an increased risk of DP in both the one- and five-year follow up. The risk of DP tended to increase with the number of children five years earlier for both cohabiting and lone working women. Long-term sickness absence was an exceptionally strong predictor of DP irrespective of age, demographic, and socioeconomic status.

**Conclusions:** The study suggests that parenthood contributes to increasing the risk of going on DP among young women, which should be valuable knowledge to employers and other policy makers. The high numbers of young women exiting from working life may be counteracted by a) extended gender equality, b) fewer work hours among

1  
2  
3 fathers and mothers of young children, and c) by financial support to lone women with  
4  
5 children.  
6  
7  
8  
9  
10  
11  
12  
13  
14  
15  
16  
17  
18  
19  
20  
21  
22  
23  
24  
25  
26  
27  
28  
29  
30  
31  
32  
33  
34  
35  
36  
37  
38  
39  
40  
41  
42  
43  
44  
45  
46  
47  
48  
49  
50  
51  
52  
53  
54  
55  
56  
57  
58  
59  
60

For peer review only

## INTRODUCTION

The exiting from working life due to reduced work capacity that has been occurring in Sweden and other OECD countries has entailed a heavy socioeconomic burden.<sup>1,2</sup> A marked increase in the number of young individuals on disability pension (DP) based on psychiatric diagnoses has been observed, which has been most pronounced among young women.<sup>3</sup> The incidence of DP among women with psychiatric diagnoses tripled in Sweden between 1998 and 2005, while men showed a two-fold increase during the same period.<sup>4</sup> Since 2004, the numbers of new DPs have declined for the population as a whole, but the downward trend does not apply to individuals below 30 years of age, according to the Swedish Social Insurance Agency.<sup>5</sup> The long-term development has not been linear because of changes in the labor market along with changes in the criteria for being granted a DP. Also, in other Nordic countries with comparable social security systems, more and more young women have been granted a DP.<sup>6-8</sup>

In previous studies we have analyzed self-reported health<sup>9,10</sup> and sickness absence<sup>11</sup> among young women with the purposes of testing the hypothesis that their work- and career-related demands along with the demands of their family life overextended their personal resources and thus contributed to impaired health and well-being. The first two studies on self-reported health were cross-sectional and based on face to face interviews. The third study with sickness absence as a measure of ill health was based on registry data with a prospective approach. The main finding was that the risk of sickness absence was higher in working mothers compared to those without children.<sup>11</sup> The present study is an extension of these studies, and the main objective was to explore the potential influence of family structure on the risk of being granted a DP among young women. Registry data were studied prospectively, and we analyzed short-term



1  
2  
3 and long-term effects controlling for potential confounding factors and the possibility of  
4  
5 a “healthy mother effect”.  
6  
7  
8  
9

## 10 11 **STUDY POPULATION AND METHODS** 12

13  
14 The study base was comprised of all of the women in Sweden born between 1960 and  
15  
16 1979 who had reached the age of 20 at base-line, which occurred between 1993 and  
17  
18 2003. The dynamic cohort consisted of 1,218,094 women who were between 20 and 43  
19  
20 years old during the follow up period. Data were retrieved from central registers  
21  
22 integrated in the Longitudinal database for health insurance and labor market studies  
23  
24 (LISA).  
25  
26

### 27 28 **Outcome** 29

30  
31 *Disability pension* could either be full time or part time. Participants were recorded as  
32  
33 being on DP the (first) year it was granted to them. In most cases, the women who went  
34  
35 on DPs during the study period were issued permanent DPs. The diminished health and  
36  
37 work capacity that is grounds for a DP in Sweden is assessed through different types of  
38  
39 systematic medical examinations that have been approved of through Swedish social  
40  
41 security legislation.  
42  
43  
44

### 45 46 **Exposures** 47

48  
49 *Family structure* was based on partner status and whether there were any children in the  
50  
51 home who were 18 years old or younger. Cohabitation meant either married or  
52  
53 cohabiting with children in common. Thus, if they were cohabiting without children in  
54  
55 common they were classified as lone. Four categories (cohabiting with children,  
56  
57  
58  
59  
60

1  
2  
3 cohabiting without children, lone with children, and lone without children) were used.  
4  
5 In a separate analysis, we also considered the number of children 18 years or younger  
6  
7 (no children, one child, two children, and three or more children). *Sickness absence*  
8  
9 (with sickness benefits) was treated as an exposure variable and comprised a medically  
10  
11 certified sickness absence exceeding 14 days of sick leave from work. Sick leaves of  
12  
13 fewer than 14 days are covered by the employer and such days are not included in the  
14  
15 registration kept by the Social Insurance Agency. For each person and year, the total  
16  
17 number of sickness absence days with sickness benefits from the insurance agency was  
18  
19 calculated, and classified into: no days, 1–30, 31–90, 91–180, 181–300, and 301–365  
20  
21 days. If one is unemployed, benefits from the Social Insurance Agency are paid from  
22  
23 the second day, which causes a lack of comparability between employed and  
24  
25 unemployed. Because of the very close relation between sickness absence and receiving  
26  
27 DP, sickness absence was excluded from the multivariate analyses of family structure.  
28  
29  
30  
31

### 32 **Potential confounders**

33  
34  
35 The following potential confounders were considered:  
36  
37

38  
39 *Employment* was broken down into employed (including self-employed) according to  
40  
41 one's income tax declaration (showing a registered employer), and not employed,  
42  
43 indicated by not having returned a tax declaration with a registered employer. We used  
44  
45 the term "not employed" instead of "unemployed" to separate the category from the  
46  
47 variable below: days of unemployment part of the year (see below). To reduce potential  
48  
49 effects from parental leave, the women were classified as employed for the year of a  
50  
51 birth if they were recorded as employed the year before as well as the year after the  
52  
53 delivery. The analyses were stratified according to employment status because not all of  
54  
55  
56  
57  
58  
59  
60

1  
2  
3 the potential confounders were relevant for women without employment, and because  
4  
5 of inconsistent measurements of sickness absence.  
6  
7

8 *Days of unemployment* was able to be assessed among women who had been employed  
9  
10 sometime in the same year in which they became unemployed. The variable measured  
11  
12 the number of days the individual had received unemployment benefits, 0 (reference),  
13  
14 1–15, 16–30, 31–60, and more than 60 days.  
15  
16

17  
18 *Sector of employment* was also restricted to women classified as employed. It was  
19  
20 divided into four groupings: national-level public sector (reference), local- and county-  
21  
22 level public sector, private sector, and “other.”  
23  
24

25 *Country of birth* originally included 37 different countries that were collapsed into 19  
26  
27 (Table 1) and subsequently into three more general categories: Sweden (reference),  
28  
29 Nordic countries other than Sweden, and countries outside the Nordic region.  
30  
31

32 *Residential area* was separated according to population density: metropolitan areas, city  
33  
34 areas, rural areas, and sparsely populated areas (reference).  
35  
36

37 Other potential confounders were *Education*, divided into 9 years or less, 10–12 years,  
38  
39 and more than 12 years (reference); annual *Income* was classified, with cut-off points at  
40  
41 the first and third quartiles, into low, medium, and high income (reference). In 1998, the  
42  
43 values at the two cut-off points were approximately € 9,200 and € 14,200, respectively.  
44  
45

## 46 **Statistical methods**

47

48  
49 The analytical approach of the present study was to account for the way in which  
50  
51 individuals’ exposure variables and potential confounders changed over time. The  
52  
53 analyses were based on the SAS MPHREG macro developed at the Channing  
54  
55 Laboratory.<sup>12</sup>The program has been used in other studies.<sup>11, 13, 14</sup> The difference from a  
56  
57  
58  
59  
60

1  
2  
3 traditional Cox proportional hazard regression was that the units of observation did not  
4  
5 correspond to individuals. Instead, an individual data record was created for each year  
6  
7 in which the participant was at risk of receiving a DP, which allowed the study variables  
8  
9 to change value each year of exposure classification. With this method, all of an  
10  
11 individual's changes regarding, for example, family composition or level of education,  
12  
13 could be accounted for across time. The number of person years at risk for an exposure  
14  
15 category in a certain year was linked to DP/no DP in a subsequent year. The hazard  
16  
17 ratio (HR) for the total follow-up period was estimated by the pooled HR across the  
18  
19 years with a 95% confidence interval. A joint control for age and calendar year was  
20  
21 built into the program.  
22  
23  
24

25  
26 Two time-spans of follow up were used, one year and five years, to study the predictive  
27  
28 value of the exposure variables – with a short and a longer time of action.  
29  
30

31 *One-year follow up:* The exposure classification was started in 1993 or the year of entry  
32  
33 into the cohort. Individuals were censored at the year of DP, emigration, or death.  
34  
35 Women with a DP at baseline were excluded.  
36  
37

38 *Five-year follow up:* The exposure variables (family structure and sickness absence),  
39  
40 were analyzed in a five-year follow up, using a similar methodology as in the one-year  
41  
42 follow up. For each year for which a five-year follow up was possible (1993–1998),  
43  
44 individual's exposure values were assessed and linked to their case status (DP/no DP)  
45  
46 five years later. Individuals who received a DP or who emigrated or died during the  
47  
48 five-year period were not taken into account for this follow-up period or the following  
49  
50 periods. Further, the women were required to be “healthy” at base line in order to  
51  
52 reduce the possibility of reversed causation (i.e., ill health influencing exposure). This  
53  
54 was fulfilled by not having a registered sickness absence during the three-year period  
55  
56  
57  
58  
59  
60

1  
2  
3 preceding the year of exposure classification. The requirement was mainly meant to  
4  
5 reduce the “healthy mother effect.”<sup>9</sup>  
6  
7  
8  
9

## 10 11 **RESULTS**

### 12 **Exploration of potential confounders (Table 1, 2)**

13  
14  
15 From 1993 to 2003, 39,605 women aged 20 to 43 were granted a DP, corresponding to a  
16  
17 rate of 39 per 10<sup>4</sup> person years; 4,345 DPs were granted to 20 to 25 year old women.  
18  
19

20  
21 The rate increased with increasing age. DP was most common in rural areas and least  
22  
23 common in metropolitan areas. Country of birth showed a considerable variation, with  
24  
25 the highest rates for those born in Greece, Lebanon-Syria-Turkey, and the former  
26  
27 Yugoslavia. The lowest rates were found for women born in the US, the UK/Ireland,  
28  
29 East Asia including Thailand and Vietnam, and Western Europe including Germany  
30  
31 (Table 1).  
32  
33  
34

35  
36 Women with low education were found to have an incidence of DP that was five times  
37  
38 higher than for those with high education, and the same increase was found when  
39  
40 comparing those who were not employed with those who were employed. Those  
41  
42 employed in the national-level public sector had the highest incidence of DP, while the  
43  
44 lowest rate was found for women in private employment. Number of days of  
45  
46 unemployment tended to show an inverse relation to the risk of being granted a DP the  
47  
48 following year. When it came to income, the rates were observed to increase as income  
49  
50 level decreased (Table 1).  
51  
52  
53  
54  
55  
56  
57  
58  
59  
60

1  
2  
3 There was no remarkable difference between the crude rates for cohabiting and lone  
4 women, but the age-adjusted HR showed an 80 percent increase in risk for the lone  
5 women. Women with children had a somewhat higher crude rate of DP, but the age-  
6 adjusted results showed the opposite, a decreased HR compared to women without  
7 children. The crude relative rates increased by number of children, but controlling for  
8 age decreased HRs were seen for one or more children, with the lowest HR for two  
9 children (Table 1).  
10  
11  
12  
13  
14  
15  
16  
17  
18

19 A powerful association was found between number of days of sickness absence in a  
20 year and the risk of receiving a DP the following year. HRs started to increase  
21 substantially at the level of 31–90 days of sickness absence and went up dramatically at  
22 higher levels (Table 1).  
23  
24  
25  
26  
27  
28

29 Multivariate models for predicting DP that included potential confounders were  
30 computed for employed and not employed women (Table 2). In employed the  
31 increasing risk of DP with age and the reversed association with days of unemployment  
32 was strengthened after control for other confounders, while the associations with low  
33 education and low income were somewhat weakened.  
34  
35  
36  
37  
38  
39

40 Among the employed, women born in countries outside of the Nordic region had a  
41 slightly higher adjusted risk of DP compared to women born in Sweden. Among women  
42 without employment, however, there was a markedly lower risk of receiving a DP for  
43 those who were born in these countries as compared to those born in Sweden. A  
44 decreased HR was also seen for not employed women from the Nordic countries (Table  
45  
46  
47  
48  
49  
50  
51  
52  
53  
54  
55  
56  
57  
58  
59  
60

1  
2  
3 The results of the investigation of potential confounding factors caused us to keep all  
4 the variables in the multivariate analyses of family structure and sickness absence.  
5  
6  
7

### 8 **Family structure and disability pension (Table 3)** 9

10  
11 As can be seen in Table 1, it was apparent that being lone, and having no children were  
12 both related to increased HRs of DP. In the multivariate analyses, the variables of  
13 partner status and children were combined, and “cohabiting women without children”  
14 was used as the reference category (Table 3).  
15  
16  
17  
18  
19

20  
21 In the one-year follow up, the risk of DP among cohabiting women with children was  
22 lower than that of the reference group, regardless of employment status. A similar result  
23 emerged for the two types of models (adjusting for age only, and the full multivariate  
24 model). Overall, lone women showed higher HRs than cohabiting women, and among  
25 employed lone women, the HR was highest for those who had children. On the other  
26 hand, among lone women with no employment, the HR was highest for those with no  
27 children (Table 3).  
28  
29  
30  
31  
32  
33  
34  
35  
36

37 In the five-year follow up, the pattern changed. Among both lone and cohabiting  
38 women, the HRs of receiving a DP tended to increase for women with children. This  
39 tendency was seen among both employed and not employed women. The pattern was  
40 similar for the two types of models, but the estimates were lower in the full multivariate  
41 models. The HRs of the full model were strengthened after controlling for health at the  
42 start of follow up, which limited the women to those who had not had a medically  
43 certified sickness absence within the three years prior to the assessment of family  
44 structure (Table 3).  
45  
46  
47  
48  
49  
50  
51  
52  
53  
54  
55  
56  
57  
58  
59  
60

1  
2  
3 To further explore the validity of the effect of living with children, in the five-year  
4 follow up, we added an analysis of the number of children based on the full model  
5  
6 controlling for health at baseline (Figure 1). The results suggested that the risk of DP  
7  
8 increased with number of children for both lone and cohabiting working women,  
9  
10 especially among lone working women. Among women without an employment, there  
11  
12 was only a weak indication in the same direction among cohabiting women.  
13  
14

#### 15 16 17 **Sickness absence and disability pension (Table 4)** 18

19  
20 In the one-year follow up, a close relation between sickness absence and the risk of DP  
21  
22 was apparent. The stratification according to employment showed that the association  
23  
24 was particularly pronounced among the employed women, and that the figures only  
25  
26 changed marginally in the multivariate analysis. It can also be noted that comparatively  
27  
28 few days of sickness absence in a year (0-30 days) were predictive of DP in the  
29  
30 following year, controlling for demographic and socioeconomic factors (Table 4).  
31  
32

33  
34 In the five-year follow up, the predictive strength of sickness absence was attenuated  
35  
36 but still evident, with a four- to five-fold increase in the risk of DP at the level of 31–90  
37  
38 days of sickness absence, and a thirty-fold increase for the highest level of absence  
39  
40 among employed women. Controlling for the potential confounders produced only  
41  
42 minor changes (Table 4).  
43  
44  
45  
46  
47  
48

#### 49 **DISCUSSION** 50

51  
52 Because of the size of the study base, there was a high degree of representativity and  
53  
54 statistical precision. This also allowed us to evaluate the importance of different time  
55  
56  
57  
58  
59  
60



1  
2  
3 spans between exposure and outcome. Potential confounding factors were considered,  
4  
5 and an attempt was made to reduce the possibility of selection bias – that the exposure  
6  
7 status could be caused by foregoing impaired health. The chosen methodology took into  
8  
9 account changes in individuals' exposure variables in all one-year follow-up analyses.  
10

11  
12 The relations between family structure and DP were inconsistent and varied according  
13  
14 to employment status and the time of follow up. In the one-year follow up, cohabiting  
15  
16 women with children had the lowest risk of receiving a DP, with only a marginal  
17  
18 difference being observed between the employed and unemployed. Lone women with  
19  
20 children in the home had the highest HR among employed women, while those lone  
21  
22 without children showed the highest HR among those who were not employed. In the  
23  
24 five-year follow up, on the other hand, living with children contributed in a consistent  
25  
26 way to increasing the risk of later DP, particularly among working women.  
27  
28  
29

30  
31 The results for cohabiting mothers suggest that living with children was related to a  
32  
33 beneficial health effect in the short term, which may be explained by a protective effect  
34  
35 of social integration provided by living with a partner and children, which in turn can be  
36  
37 due to a selection bias, a “healthy mother effect”. On the other hand, in the five-year  
38  
39 follow up, the cohabiting mothers were at a higher risk of receiving a DP compared to  
40  
41 those without children. A portion of the cohabiting women who divorced within the  
42  
43 five-year follow-up period may have experienced a difficult divorce or other setback,  
44  
45 and this could possibly have been more common among mothers or particularly  
46  
47 vulnerable mothers. Those who divorced during this follow up were thus  
48  
49 “misclassified” part of the five-year follow-up period and their risk of DP may come  
50  
51 closer to the pattern of single mothers (in the one-year follow up such misclassification  
52  
53 was avoided). Lone working mothers had the highest risk of DP both in the short- and  
54  
55  
56  
57  
58  
59  
60

1  
2  
3 long-term, which is in line with expectations. Previous studies have clearly pointed out  
4 the vulnerability of this group<sup>15,16</sup>, which may be explained by the heavy workload and  
5  
6 greater responsibility that is shouldered by many of these women. The reasons behind  
7  
8 the relatively high risk of receiving a DP that was found among lone women who were  
9  
10 not employed and without children are not clear, but it is plausible that it may be  
11  
12 connected to these individuals suffering from social isolation or marginalization that  
13  
14 may have been the result of severe illness or handicap early in life.<sup>17</sup> Analyses of the  
15  
16 medical diagnoses related to the DP could have helped explain these findings, but,  
17  
18 unfortunately, such information on diagnosis-specific DP was not available for use in  
19  
20 the study.  
21  
22  
23  
24

25  
26 In the five-year follow up, we could at base line control for a bias that we have  
27  
28 encountered in previous studies – the “healthy mother effect”, by the requirement that  
29  
30 all individuals should be “healthy” during the three year period preceding the exposure  
31  
32 assessment. In the one-year follow up, where the exposure was assessed very close in  
33  
34 time to the outcome, a comparable analysis seemed less appropriate. The requirement of  
35  
36 no sickness absence so close in time to the DP should entail a selection of specific DP  
37  
38 diagnoses where injuries and accidents in particular would remain.  
39  
40  
41

42 The five-year predictive value of days of sickness absence was evident, and it was even  
43  
44 stronger in the one-year follow up, which demonstrates the importance of the aspect of  
45  
46 health for the developments leading up to DP, as well as the impact that the length of  
47  
48 follow up has on the estimate. It was obvious that the link between sickness absence and  
49  
50 DP varies according to the time span between the two measurements, and long-term  
51  
52 sickness absence seems to be a precipitating factor for receiving a DP. The strong  
53  
54 association found between sickness absence and receiving a DP was consistent with  
55  
56  
57  
58  
59  
60

1  
2  
3 previous findings from Sweden and other Nordic countries, including studies of  
4  
5 municipal employees in Finland<sup>18</sup>, of employees from the private sector in Denmark,<sup>19</sup>,  
6  
7 and of representative subpopulations in Sweden<sup>20</sup>. The transition from sickness absence  
8  
9 to DP has also been previously studied among individuals who all had a long-term  
10  
11 sickness absence<sup>e.g., 21, 22</sup>. To the best of our knowledge, no study has focused on young  
12  
13 women in particular, the group with the largest increase in DP during the last decades.

14  
15  
16  
17 The results show the complexity of the relation between family structure and DP. A  
18  
19 considerable part of the social expenses due to DP should be attributed to lone working  
20  
21 women with children. Their decreased work capacity may be explained by a heavy total  
22  
23 workload and shortage of time, and may have health implications not only for the  
24  
25 mothers but probably also for the children. The increased risk of receiving a DP among  
26  
27 lone women without children and without a job could indicate that detrimental  
28  
29 marginalization or social isolation is contributing to their work incapacity. Further,  
30  
31 future studies should address the question about the potential health effects that may  
32  
33 affect women who transition from cohabiting mothers to lone mothers. Studies similar  
34  
35 to the present but with a focus on men are also warranted.  
36  
37  
38  
39  
40  
41  
42

#### 43 **FUNDING**

44  
45  
46 The study was supported by the Swedish Council for Working Life and Social  
47  
48 Research, Grant nr 2009-0453.  
49  
50

#### 51 **COMPETING INTEREST**

1  
2  
3  
4  
5  
6  
7  
8  
9  
10  
11  
12  
13  
14  
15  
16  
17  
18  
19  
20  
21  
22  
23  
24  
25  
26  
27  
28  
29  
30  
31  
32  
33  
34  
35  
36  
37  
38  
39  
40  
41  
42  
43  
44  
45  
46  
47  
48  
49  
50  
51  
52  
53  
54  
55  
56  
57  
58  
59  
60

The authors declare no conflicts of interest.

**STUDY APPROVAL**

The study was approved by the regional research ethics committee in Stockholm (Dnr: 2010/176-31/5).

For peer review only

**FIGURE LEGEND**

Figure 1. Relative risks of going on DP according to family structure among employed and not employed women: a five-year follow up, excluding those with sickness absence within the three years before base line and controlling for potential confounders.

For peer review only

Table 1. Demographic factors, socioeconomic factors, and days of sickness absence related to disability pension in the one-year follow up during 1993–2003 among women in Sweden aged 20–43 years and born between 1960–1979.

|                                                               | Person<br>years | Crude<br>rate <sup>a</sup> | Crude<br>relative<br>rate | Exp.<br>cases | HR <sup>b</sup> | (95% CI) |      |
|---------------------------------------------------------------|-----------------|----------------------------|---------------------------|---------------|-----------------|----------|------|
| Total                                                         | 10278639        | 39                         |                           | 39605         |                 |          |      |
| Age group                                                     |                 |                            |                           |               |                 |          |      |
| 20–25 years                                                   | 2909604         | 15                         | 1.00                      | 4345          | 1.00            |          |      |
| 26–30 years                                                   | 2964268         | 26                         | 1.75                      | 7755          | 1.66            | 1.60     | 1.72 |
| 31–35 years                                                   | 2814482         | 47                         | 3.14                      | 13218         | 2.92            | 2.82     | 3.02 |
| 36+ years                                                     | 1590285         | 90                         | 6.02                      | 14287         | 4.54            | 4.38     | 4.71 |
| Residential area                                              |                 |                            |                           |               |                 |          |      |
| Sparsely populated areas                                      | 497386          | 44                         | 1.00                      | 2166          | 1.00            |          |      |
| Rural areas                                                   | 507730          | 54                         | 1.25                      | 2755          | 1.28            | 1.21     | 1.35 |
| City areas                                                    | 5159644         | 41                         | 0.94                      | 21061         | 0.97            | 0.93     | 1.01 |
| Metropolitan areas                                            | 4111669         | 33                         | 0.76                      | 13621         | 0.78            | 0.74     | 0.82 |
| Country of birth                                              |                 |                            |                           |               |                 |          |      |
| Sweden                                                        | 8807028         | 37                         | 1.00                      | 32678         | 1.00            |          |      |
| Denmark, Finland, Norway, Iceland                             | 268139          | 53                         | 1.43                      | 1425          | 1.20            | 1.13     | 1.26 |
| United Kingdom and Ireland                                    | 18296           | 21                         | 0.56                      | 38            | 0.49            | 0.36     | 0.68 |
| Poland                                                        | 62449           | 47                         | 1.26                      | 293           | 1.14            | 1.02     | 1.28 |
| Eastern Europe incl. Romania,<br>Hungary, former DDR and USSR | 76647           | 30                         | 0.81                      | 229           | 0.71            | 0.62     | 0.80 |
| Bosnia-Herzegovina                                            | 79481           | 35                         | 0.94                      | 276           | 0.83            | 0.74     | 0.94 |
| Former Yugoslavia excl. Bosnia-<br>Herzegovina                | 104404          | 76                         | 2.05                      | 794           | 1.72            | 1.60     | 1.84 |
| Greece                                                        | 11761           | 121                        | 3.25                      | 142           | 2.72            | 2.31     | 3.21 |
| Western Europe incl. Germany                                  | 48946           | 25                         | 0.67                      | 121           | 0.60            | 0.50     | 0.71 |
| Iraq                                                          | 67727           | 42                         | 1.13                      | 283           | 0.98            | 0.87     | 1.10 |
| Lebanon, Syria, and Turkey                                    | 143657          | 84                         | 2.26                      | 1204          | 2.24            | 2.12     | 2.38 |
| South Central Asia incl. Iran                                 | 140861          | 53                         | 1.43                      | 746           | 1.34            | 1.25     | 1.44 |
| Ethiopia and Somalia                                          | 57713           | 25                         | 0.69                      | 147           | 0.69            | 0.59     | 0.81 |
| Africa excl. Ethiopia and Somalia                             | 61247           | 46                         | 1.25                      | 283           | 1.12            | 1.00     | 1.26 |
| East Asia incl. Thailand and Vietnam                          | 144465          | 23                         | 0.61                      | 327           | 0.59            | 0.53     | 0.65 |
| USA                                                           | 25521           | 15                         | 0.41                      | 39            | 0.37            | 0.27     | 0.50 |
| Chile                                                         | 49665           | 48                         | 1.29                      | 237           | 1.27            | 1.12     | 1.44 |
| South America excl. Chile                                     | 40229           | 32                         | 0.87                      | 130           | 0.84            | 0.71     | 1.00 |
| Other Countries                                               | 70403           | 30                         | 0.82                      | 213           | 0.75            | 0.66     | 0.86 |
| Education                                                     |                 |                            |                           |               |                 |          |      |
| High, more than 12 years                                      | 3208713         | 17                         | 1.00                      | 5313          | 1.00            |          |      |
| Medium, 10–12 years                                           | 5674755         | 40                         | 2.40                      | 22577         | 2.72            | 2.64     | 2.80 |
| Low, 9 years or less                                          | 1369063         | 83                         | 5.04                      | 11418         | 5.97            | 5.78     | 6.17 |

|    |                                                            |         |      |        |       |        |        |        |
|----|------------------------------------------------------------|---------|------|--------|-------|--------|--------|--------|
| 1  |                                                            |         |      |        |       |        |        |        |
| 2  |                                                            |         |      |        |       |        |        |        |
| 3  |                                                            |         |      |        |       |        |        |        |
| 4  | Employment                                                 |         |      |        |       |        |        |        |
| 5  | Employed                                                   | 8724849 | 23   | 1.00   | 19645 | 1.00   |        |        |
| 6  | Not employed                                               | 1553790 | 128  | 5.71   | 19960 | 6.76   | 6.63   | 6.90   |
| 7  |                                                            |         |      |        |       |        |        |        |
| 8  | Employment sector                                          |         |      |        |       |        |        |        |
| 9  | National public sector                                     | 672544  | 30   | 1.00   | 2042  | 1.00   |        |        |
| 10 | Local and County public sector                             | 3417883 | 25   | 0.83   | 8649  | 0.83   | 0.79   | 0.88   |
| 11 | Private sector                                             | 4082880 | 18   | 0.60   | 7435  | 0.66   | 0.63   | 0.70   |
| 12 | Other sector                                               | 517698  | 29   | 0.95   | 1498  | 1.06   | 0.99   | 1.13   |
| 13 |                                                            |         |      |        |       |        |        |        |
| 14 | Days of unemployment                                       |         |      |        |       |        |        |        |
| 15 | 0 days                                                     | 7570643 | 42   | 1.00   | 31486 | 1.00   |        |        |
| 16 | 1–15 days                                                  | 273581  | 41   | 0.98   | 1114  | 1.25   | 1.18   | 1.33   |
| 17 | 16–30 days                                                 | 238987  | 31   | 0.74   | 738   | 1.03   | 0.95   | 1.11   |
| 18 | 31–60 days                                                 | 425404  | 28   | 0.68   | 1206  | 0.95   | 0.90   | 1.01   |
| 19 | >60 days                                                   | 1770024 | 29   | 0.69   | 5061  | 0.95   | 0.92   | 0.98   |
| 20 |                                                            |         |      |        |       |        |        |        |
| 21 |                                                            |         |      |        |       |        |        |        |
| 22 | Income                                                     |         |      |        |       |        |        |        |
| 23 | High, above 3rd quartile                                   | 2600723 | 34   | 1.00   | 8721  | 1.00   |        |        |
| 24 | Medium, 1st–3rd quartile                                   | 4937461 | 41   | 1.21   | 20095 | 1.59   | 1.55   | 1.63   |
| 25 | Low, below 1st quartile                                    | 2554492 | 41   | 1.23   | 10559 | 2.32   | 2.25   | 2.39   |
| 26 |                                                            |         |      |        |       |        |        |        |
| 27 | Partner status                                             |         |      |        |       |        |        |        |
| 28 | Cohabiting                                                 | 4750441 | 36   | 1.00   | 17304 | 1.00   |        |        |
| 29 | Lone                                                       | 5528198 | 40   | 1.11   | 22301 | 1.82   | 1.79   | 1.86   |
| 30 |                                                            |         |      |        |       |        |        |        |
| 31 | Children                                                   |         |      |        |       |        |        |        |
| 32 | Without (no) children                                      | 4886709 | 32   | 1.00   | 15464 | 1.00   |        |        |
| 33 | With children                                              | 5391930 | 45   | 1.41   | 24141 | 0.74   | 0.72   | 0.76   |
| 34 |                                                            |         |      |        |       |        |        |        |
| 35 | Number of children                                         |         |      |        |       |        |        |        |
| 36 | No Children                                                | 4886709 | 33   | 1.00   | 15464 | 1.00   |        |        |
| 37 | One child                                                  | 1769317 | 38   | 1.16   | 6463  | 0.76   | 0.74   | 0.79   |
| 38 | Two children                                               | 2504169 | 42   | 1.30   | 10573 | 0.66   | 0.65   | 0.68   |
| 39 | Three or more children                                     | 1118444 | 64   | 1.95   | 7105  | 0.88   | 0.85   | 0.91   |
| 40 |                                                            |         |      |        |       |        |        |        |
| 41 |                                                            |         |      |        |       |        |        |        |
| 42 | Days of sickness absence                                   |         |      |        |       |        |        |        |
| 43 | 0 days                                                     | 8741046 | 9    | 1.00   | 7432  | 1.00   |        |        |
| 44 | 1–30 days                                                  | 795630  | 9    | 1.02   | 688   | 1.03   | 0.95   | 1.11   |
| 45 | 31–90 days                                                 | 368512  | 36   | 4.20   | 1317  | 4.17   | 3.93   | 4.42   |
| 46 | 91–180 days                                                | 171430  | 154  | 18.08  | 2635  | 17.68  | 16.90  | 18.49  |
| 47 | 181–300 days                                               | 98877   | 639  | 75.20  | 6322  | 71.22  | 68.79  | 73.73  |
| 48 | 301–365 days                                               | 103144  | 2056 | 241.87 | 21211 | 222.30 | 216.07 | 228.71 |
| 49 |                                                            |         |      |        |       |        |        |        |
| 50 |                                                            |         |      |        |       |        |        |        |
| 51 | <sup>a</sup>                                               |         |      |        |       |        |        |        |
| 52 | Number of new disability pensions per 10,000 person years. |         |      |        |       |        |        |        |
| 53 | <sup>b</sup>                                               |         |      |        |       |        |        |        |
| 54 | Adjusted for age.                                          |         |      |        |       |        |        |        |
| 55 |                                                            |         |      |        |       |        |        |        |
| 56 |                                                            |         |      |        |       |        |        |        |
| 57 |                                                            |         |      |        |       |        |        |        |
| 58 |                                                            |         |      |        |       |        |        |        |
| 59 |                                                            |         |      |        |       |        |        |        |
| 60 |                                                            |         |      |        |       |        |        |        |

<sup>a</sup> Number of new disability pensions per 10,000 person years.

<sup>b</sup> Adjusted for age.

Table 2. Multivariate analyses relating the demographic and socioeconomic factors to disability pension in the one-year follow up during 1993-2003 among the employed and not employed women.

|                                   | Employed   |                 |          |      | Not employed |            |                 |          |  |  |
|-----------------------------------|------------|-----------------|----------|------|--------------|------------|-----------------|----------|--|--|
|                                   | Exp. cases | HR <sup>a</sup> | (95% CI) |      |              | Exp. cases | HR <sup>b</sup> | (95% CI) |  |  |
| Age group                         |            |                 |          |      |              |            |                 |          |  |  |
| All ages                          | 19539      |                 |          |      | 19742        |            |                 |          |  |  |
| 20–25 years                       | 1425       | 1.00            |          |      | 2888         | 1.00       |                 |          |  |  |
| 26–30 years                       | 3368       | 2.31            | 2.17     | 2.46 | 4342         | 1.60       | 1.53            | 1.68     |  |  |
| 31–35 years                       | 6795       | 4.67            | 4.40     | 4.96 | 6340         | 2.65       | 2.54            | 2.77     |  |  |
| 36+ years                         | 7951       | 7.45            | 7.00     | 7.93 | 6172         | 4.36       | 4.16            | 4.57     |  |  |
| Residential area                  |            |                 |          |      |              |            |                 |          |  |  |
| Sparsely populated areas          | 1183       | 1.00            |          |      | 974          | 1.00       |                 |          |  |  |
| Rural areas                       | 1428       | 1.30            | 1.21     | 1.41 | 1312         | 1.33       | 1.22            | 1.44     |  |  |
| City areas                        | 10341      | 0.96            | 0.91     | 1.02 | 10569        | 1.05       | 0.98            | 1.12     |  |  |
| Metropolitan areas                | 6587       | 0.86            | 0.81     | 0.92 | 6887         | 0.96       | 0.90            | 1.03     |  |  |
| Country of birth                  |            |                 |          |      |              |            |                 |          |  |  |
| Sweden                            | 16909      | 1.00            |          |      | 15643        | 1.00       |                 |          |  |  |
| Denmark, Finland, Norway, Iceland | 632        | 1.02            | 0.94     | 1.10 | 765          | 0.70       | 0.65            | 0.76     |  |  |
| Other                             | 1998       | 1.18            | 1.12     | 1.24 | 3334         | 0.30       | 0.29            | 0.32     |  |  |
| Education                         |            |                 |          |      |              |            |                 |          |  |  |
| High, more than 12 years          | 3406       | 1.00            |          |      | 1901         | 1.00       |                 |          |  |  |
| Medium, 10–12 years               | 12034      | 2.40            | 2.31     | 2.50 | 10531        | 2.53       | 2.41            | 2.66     |  |  |
| Low, 9 years or less              | 4099       | 4.91            | 4.69     | 5.15 | 7310         | 3.61       | 3.43            | 3.80     |  |  |
| Income                            |            |                 |          |      |              |            |                 |          |  |  |
| High, above 3rd quartile          | 5511       | 1.00            |          |      |              |            |                 |          |  |  |
| Medium, 1st-3rd quartile          | 11262      | 1.31            | 1.26     | 1.35 |              |            |                 |          |  |  |
| Low, below 1st quartile           | 2766       | 1.38            | 1.31     | 1.45 |              |            |                 |          |  |  |
| Employment sector                 |            |                 |          |      |              |            |                 |          |  |  |
| National public sector            | 2027       | 1.00            |          |      |              |            |                 |          |  |  |
| Local and county public sector    | 8619       | 0.74            | 0.70     | 0.78 |              |            |                 |          |  |  |
| Private sector                    | 7403       | 0.53            | 0.50     | 0.56 |              |            |                 |          |  |  |
| Other sector                      | 1490       | 0.93            | 0.87     | 0.99 |              |            |                 |          |  |  |
| Days of unemployment              |            |                 |          |      |              |            |                 |          |  |  |
| 0 days                            | 16629      | 1.00            |          |      |              |            |                 |          |  |  |
| 1–15 days                         | 447        | 0.91            | 0.83     | 1.00 |              |            |                 |          |  |  |
| 16–30 days                        | 294        | 0.77            | 0.69     | 0.87 |              |            |                 |          |  |  |
| 31–60 days                        | 470        | 0.71            | 0.65     | 0.78 |              |            |                 |          |  |  |
| >60 days                          | 1699       | 0.70            | 0.66     | 0.73 |              |            |                 |          |  |  |

<sup>a</sup> The model included age, residential area, country of birth, education, income, employment sector, and days of unemployment.

<sup>b</sup> The model included age, residential area, country of birth, and education.



1  
2  
3  
4  
5  
6  
7  
8  
9  
10  
11  
12  
13  
14  
15  
16  
17  
18  
19  
20  
21  
22  
23  
24  
25  
26  
27  
28  
29  
30  
31  
32  
33  
34  
35  
36  
37  
38  
39  
40  
41  
42  
43  
44  
45  
46  
47  
48  
49  
50  
51  
52  
53  
54  
55  
56  
57  
58  
59  
60

For peer review only

Table 3. Multivariate analyses relating family structure to disability pension in the one-year and five-year follow up during 1993-2003 among employed and not employed women.

|                                                             | Employed   |      |           | Not employed |      |           |
|-------------------------------------------------------------|------------|------|-----------|--------------|------|-----------|
|                                                             | Exp. cases | HR   | (95% CI)  | Exp. cases   | HR   | (95% CI)  |
| <b>One-year follow up</b>                                   |            |      |           |              |      |           |
| Family structure <sup>a</sup>                               |            |      |           |              |      |           |
| Total                                                       | 19645      |      |           | 19960        |      |           |
| Cohabiting+no children                                      | 785        | 1.00 |           | 654          | 1.00 |           |
| Cohabiting+children                                         | 9320       | 0.80 | 0.74 0.86 | 6545         | 0.88 | 0.81 0.96 |
| Lone+no children                                            | 5853       | 1.08 | 1.00 1.17 | 8172         | 2.05 | 1.89 2.22 |
| Lone+children                                               | 3687       | 1.35 | 1.25 1.46 | 4589         | 1.64 | 1.51 1.78 |
| Family structure <sup>b</sup>                               |            |      |           |              |      |           |
| Total                                                       | 19539      |      |           | 19742        |      |           |
| Cohabiting+no children                                      | 780        | 1.00 |           | 648          | 1.00 |           |
| Cohabiting+children                                         | 9268       | 0.73 | 0.68 0.78 | 6460         | 0.63 | 0.59 0.69 |
| Lone+no children                                            | 5835       | 1.07 | 0.99 1.16 | 8099         | 1.35 | 1.24 1.46 |
| Lone+children                                               | 3656       | 1.23 | 1.14 1.33 | 4535         | 0.99 | 0.91 1.08 |
| <b>Five-year follow up</b>                                  |            |      |           |              |      |           |
| Family structure <sup>a</sup>                               |            |      |           |              |      |           |
| Total                                                       | 20170      |      |           | 9598         |      |           |
| Cohabiting+no children                                      | 616        | 1.00 |           | 241          | 1.00 |           |
| Cohabiting+children                                         | 9893       | 1.31 | 1.21 1.42 | 3954         | 1.39 | 1.22 1.58 |
| Lone+no children                                            | 5945       | 1.10 | 1.01 1.19 | 3070         | 1.89 | 1.66 2.16 |
| Lone+children                                               | 3716       | 2.35 | 2.16 2.57 | 2333         | 2.45 | 2.15 2.80 |
| Family structure <sup>b</sup>                               |            |      |           |              |      |           |
| Total                                                       | 20057      |      |           | 9598         |      |           |
| Cohabiting+no children                                      | 615        | 1.00 |           | 241          | 1.00 |           |
| Cohabiting+children                                         | 9804       | 1.13 | 1.04 1.23 | 3954         | 1.09 | 0.95 1.24 |
| Lone+no children                                            | 5938       | 1.07 | 0.98 1.16 | 3070         | 1.44 | 1.26 1.65 |
| Lone+children                                               | 3700       | 1.69 | 1.55 1.85 | 2333         | 1.62 | 1.41 1.85 |
| <b>Five-year follow up "Healthy" at start of follow up:</b> |            |      |           |              |      |           |
| Family structure <sup>b</sup>                               |            |      |           |              |      |           |
| Total                                                       | 6705       |      |           | 3871         |      |           |
| Cohabiting+no children                                      | 215        | 1.00 |           | 117          | 1.00 |           |
| Cohabiting+children                                         | 2778       | 1.24 | 1.08 1.43 | 1447         | 1.18 | 0.97 1.42 |
| Lone+no children                                            | 2618       | 1.23 | 1.07 1.42 | 1467         | 1.83 | 1.51 2.22 |
| Lone+children                                               | 1094       | 1.91 | 1.64 2.22 | 840          | 1.94 | 1.59 2.36 |

<sup>a</sup> Adjusted for age.

1  
2  
3 b The model for employed included age, residential area, country of birth, education, income, employment sector, and  
4 days of unemployment. The model for not employed included, age, residential area, country of birth, and education.  
5  
6  
7  
8  
9  
10  
11  
12  
13  
14  
15  
16  
17  
18  
19  
20  
21  
22  
23  
24  
25  
26  
27  
28  
29  
30  
31  
32  
33  
34  
35  
36  
37  
38  
39  
40  
41  
42  
43  
44  
45  
46  
47  
48  
49  
50  
51  
52  
53  
54  
55  
56  
57  
58  
59  
60

For peer review only

Table 4. Multivariate analyses relating days of sickness absence to disability pension in the one-year and five-year follow up during 1993-2003 among employed and not employed women.

|                                                            | Employed   |        |          |        | Not employed |       |          |       |
|------------------------------------------------------------|------------|--------|----------|--------|--------------|-------|----------|-------|
|                                                            | Exp. cases | HR     | (95% CI) |        | Exp. cases   | HR    | (95% CI) |       |
| <b>One-year follow up</b>                                  |            |        |          |        |              |       |          |       |
| Days of sickness absence <sup>a</sup>                      |            |        |          |        |              |       |          |       |
| Total                                                      | 19645      |        |          |        | 19960        |       |          |       |
| 0 days                                                     | 1556       | 1.00   |          |        | 5876         | 1.00  |          |       |
| 1-30 days                                                  | 404        | 2.67   | 2.39     | 2.98   | 284          | 0.80  | 0.71     | 0.90  |
| 31-90 days                                                 | 801        | 11.23  | 10.31    | 12.24  | 516          | 3.21  | 2.94     | 3.52  |
| 91-180 days                                                | 1668       | 51.74  | 48.24    | 55.49  | 967          | 9.28  | 8.67     | 9.94  |
| 181-300 days                                               | 3953       | 230.80 | 217.30   | 245.13 | 2369         | 21.45 | 20.42    | 22.53 |
| 301-365 days                                               | 11263      | 768.25 | 726.67   | 812.21 | 9948         | 46.70 | 45.08    | 48.39 |
| Days of sickness absence <sup>b</sup>                      |            |        |          |        |              |       |          |       |
| Total                                                      | 19539      |        |          |        | 19742        |       |          |       |
| 0 days                                                     | 1535       | 1.00   |          |        | 5771         | 1.00  |          |       |
| 1-30 days                                                  | 401        | 2.56   | 2.29     | 2.85   | 284          | 0.78  | 0.69     | 0.88  |
| 31-90 days                                                 | 795        | 11.20  | 10.27    | 12.20  | 506          | 3.02  | 2.75     | 3.31  |
| 91-180 days                                                | 1665       | 51.09  | 47.62    | 54.81  | 960          | 8.48  | 7.91     | 9.09  |
| 181-300 days                                               | 3937       | 220.85 | 207.85   | 234.67 | 2364         | 18.56 | 17.64    | 19.52 |
| 301-365 days                                               | 11206      | 738.19 | 697.75   | 780.97 | 9857         | 39.33 | 37.90    | 40.82 |
| <b>Five-year follow up</b>                                 |            |        |          |        |              |       |          |       |
| Days of sickness absence <sup>a</sup>                      |            |        |          |        |              |       |          |       |
| Total                                                      | 20170      |        |          |        | 9598         |       |          |       |
| 0 days                                                     | 11260      | 1.00   |          |        | 5862         | 1.00  |          |       |
| 1-30 days                                                  | 3175       | 3.14   | 3.02     | 3.27   | 988          | 2.06  | 1.93     | 2.21  |
| 31-90 days                                                 | 2246       | 5.39   | 5.15     | 5.64   | 658          | 4.08  | 3.76     | 4.42  |
| 91-180 days                                                | 1584       | 10.00  | 9.48     | 10.54  | 626          | 7.75  | 7.13     | 8.42  |
| 181-300 days                                               | 1109       | 19.18  | 18.03    | 20.41  | 616          | 11.58 | 10.65    | 12.59 |
| 301-365 days                                               | 796        | 32.21  | 29.97    | 34.62  | 548          | 19.33 | 17.98    | 20.79 |
| Days of sickness absence <sup>b</sup>                      |            |        |          |        |              |       |          |       |
| Total                                                      | 20057      |        |          |        | 9598         |       |          |       |
| 0 days                                                     | 11218      | 1.00   |          |        | 5862         | 1.00  |          |       |
| 1-30 days                                                  | 3149       | 2.76   | 2.65     | 2.88   | 988          | 1.86  | 1.73     | 1.99  |
| 31-90 days                                                 | 2221       | 4.89   | 4.67     | 5.12   | 658          | 3.61  | 3.33     | 3.92  |
| 91-180 days                                                | 1574       | 8.90   | 8.43     | 9.38   | 626          | 6.70  | 6.16     | 7.29  |
| 181-300 days                                               | 1102       | 16.36  | 15.37    | 17.41  | 616          | 9.48  | 8.71     | 10.32 |
| 301-365 days                                               | 793        | 28.31  | 26.32    | 30.44  | 848          | 15.89 | 14.75    | 17.12 |
| <b>Five-year follow up "Healthy" at start of follow up</b> |            |        |          |        |              |       |          |       |
| Days of sickness absence <sup>b</sup>                      |            |        |          |        |              |       |          |       |
| Total                                                      | 6705       |        |          |        | 3871         |       |          |       |

|              |      |       |       |       |      |       |      |       |
|--------------|------|-------|-------|-------|------|-------|------|-------|
| 0 days       | 5051 | 1.00  |       |       | 3587 | 1.00  |      |       |
| 1–30 days    | 748  | 2.74  | 2.53  | 2.96  | 114  | 1.28  | 1.06 | 1.54  |
| 31–90 days   | 437  | 4.34  | 3.93  | 4.79  | 74   | 3.13  | 2.48 | 3.94  |
| 91–180 days  | 256  | 8.19  | 7.22  | 9.29  | 38   | 4.08  | 2.96 | 5.63  |
| 181–300 days | 172  | 20.11 | 17.26 | 23.43 | 39   | 9.28  | 6.76 | 12.74 |
| 301–365 days | 41   | 27.44 | 20.17 | 37.34 | 19   | 15.64 | 9.95 | 24.57 |

<sup>a</sup> Adjusted for age.

<sup>b</sup> The model for employed included age, residential area, country of birth, education, income, employment sector, and days of unemployment. The model for not employed included age, residential area, country of birth, and education.

1  
2  
3  
4  
5  
6  
7  
8  
9  
10  
11  
12  
13  
14  
15  
16  
17  
18  
19  
20  
21  
22  
23  
24  
25  
26  
27  
28  
29  
30  
31  
32  
33  
34  
35  
36  
37  
38  
39  
40  
41  
42  
43  
44  
45  
46  
47  
48  
49  
50  
51  
52  
53  
54  
55  
56  
57  
58  
59  
60

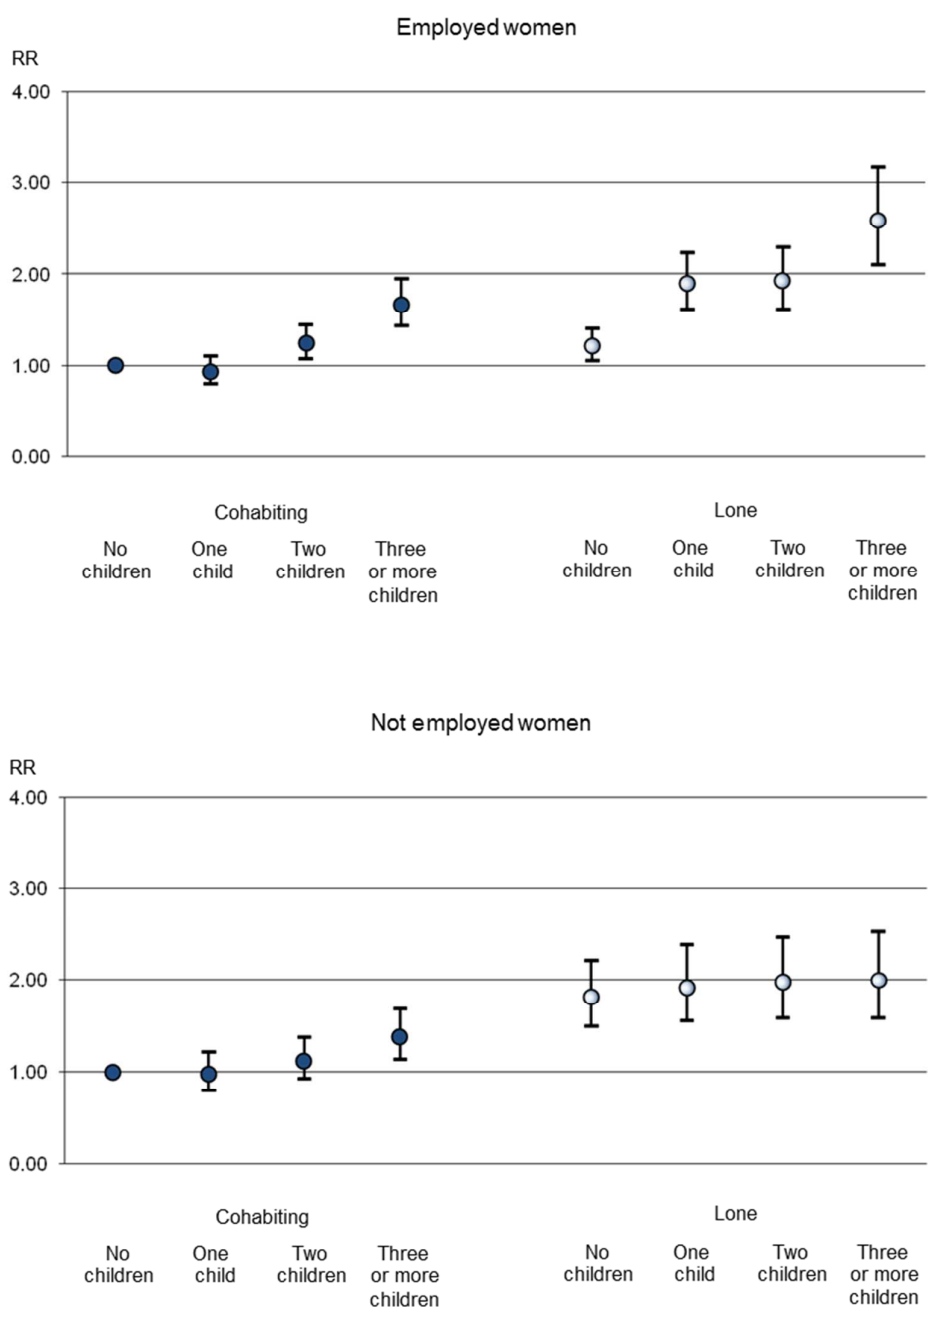

**REFERENCES**

1. OECD. *Sickness, Disability and Work: Breaking the Barriers - Vol. 3: Denmark, Finland, Ireland and the Netherlands*. OECD, Paris 2008.
2. OECD. *Sickness, Disability and Work: Breaking the Barriers - Sweden: Will the recent reforms make it?* OECD, Paris 2009.
3. OECD. *Sickness, Disability and Work: Breaking the Barriers - A Synthesis of Findings across OECD Countries*, OECD, Paris 2010.
4. Försäkringskassan (The Swedish Social Insurance Agency). *Diagnosmönster i förändring - nybeviljade förtidspensioner, sjukersättningar och aktivitetsersättningar 1971 - 2005*. [Changing Diagnostic Patterns – Newly Granted Disability Pensions, Sickness and Rehabilitation Allowances 1971–2005 ] Försäkringskassan Redovisar 2007:3, Stockholm 2007. (In Swedish)
5. Försäkringskassan (The Swedish Social Insurance Agency). *Social insurance in figures 2008*. Försäkringskassan 2009, Stockholm 2009.
6. Bjorngaard JH, Krokstad S, Johnsen R et al. *Epidemiologisk forskning om uførepensjon i Norden*. [Epidemiological Research on Disability Pensions in the Nordic Countries] *Norsk Epidemiologi* 2009;19:103-114. (Review in Norwegian)
7. Thorlacius S, Stefánsson SB, Olafsson S et al. *Increased incidence of disability due to mental and behavioural disorders in Iceland 1990-2007*. *J Mental Health* 2010;19(2):176-183.

- 1  
2  
3 8. Gjesdal S, Lie RT, Maeland JG. Variations in the risk of disability pension in Norway  
4  
5 1970-99. A gender-specific age-period-cohort analysis. *Scand J Public Health*  
6  
7 2004;32(5):340-348.  
8  
9
- 10 9. Floderus B, Hagman M, Aronsson G et al. Self-reported health in mothers: the impact of  
11  
12 age, and socioeconomic conditions. *Women Health* 2008;47(2):63-86.  
13  
14
- 15 10. Floderus B, Hagman M, Aronsson G et al. Work status, work hours and health in women  
16  
17 with and without children. *Occup Environ Med* 2009;66(10):704-710.  
18  
19
- 20 11. Floderus B, Hagman M, Aronsson G et al. Medically certified sickness absence with  
21  
22 insurance benefits in women with and without children. *Eur J Public Health* 2011 (open  
23  
24 access publication).  
25  
26
- 27 12. Hertzmark E, Spiegelman D. The SAS MPHREG macro. Boston, MA: Channing  
28  
29 Laboratory, 2001.  
30  
31
- 32 13. Wise LA, Palmer JR, Harlow BL et al. Reproductive factors, hormonal contraception,  
33  
34 and risk of uterine leiomyomata in African-American women: A prospective study. *Am*  
35  
36  
37  
38  
39  
40  
41  
42  
43  
44  
45  
46  
47  
48  
49  
50  
51  
52  
53  
54  
55  
56  
57  
58  
59  
60  
60  
*J Epidemiol* 2004;159:113-123.
14. Boynton-Jarrett R, Rich-Edwards J, Malspeis S et al. A prospective study of  
hypertension and risk of uterine leiomyomata. *Am J Epidemiol* 2005; 161:628-638.
15. Benzeval M. The self-reported health status of lone parents. *Soc Sci Med*  
1998;46(10):1337-1353.
16. Burstrom B, Whitehead M, Clayton S et al. Health inequalities between lone and couple  
mothers and policy under different welfare regimes - The example of Italy, Sweden and  
Britain. *Soc Sci Med* 2010;70:912-920.



- 1  
2  
3  
4  
5  
6  
7  
8  
9  
10  
11  
12  
13  
14  
15  
16  
17  
18  
19  
20  
21  
22  
23  
24  
25  
26  
27  
28  
29  
30  
31  
32  
33  
34  
35  
36  
37  
38  
39  
40  
41  
42  
43  
44  
45  
46  
47  
48  
49  
50  
51  
52  
53  
54  
55  
56  
57  
58  
59  
60
17. Gravseth HM, Bjerkedal T, Irgens LM et al. Life course determinants for early disability pension: a follow-up of Norwegian men and women born 1967-1976. *Eur J Epidemiol* 2007;22:533-543.
  18. Kivimäki M, Forma P, Wikström J et al . Sickness absence as a risk marker of future disability pension: the 10-town study. *J Epidemiol Community Health* 2004;58(8):710-711.
  19. Lund T, Kivimäki M, Labriola M et al. Using administrative sickness absence data as a marker of future disability pension: the prospective DREAM study of Danish private sector employees. *Occup Environ Med* 2008;65(1):28-31. Epub 2007 July 11.
  20. Wallman T, Wedel H, Palmer E et al. Sick leave track record and other potential predictors of a disability pension. A population based study of 8,218 men and women followed for 16 years. *BMC Public Health* 2009;9:104.
  21. Borg K, Hensing G, Alexanderson K. Predictive factors for disability pension--an 11-year follow up of young persons on sick leave due to neck, shoulder, or back diagnoses. *Scand J Public Health* 2001;29(2):104-112.
  22. Gjesdal S, Bratberg E. The role of gender in long-term sickness absence and transition to permanent disability benefits. Results from a multiregister based, prospective study in Norway 1990-1995. *Eur J Public Health* 2002;12(3):180-186.

## STROBE Statement—checklist of items that should be included in reports of observational studies

|                              | Item No | Recommendation                                                                                                                                                                                                                                                                                                                                                                                                                                                                                                                                                                                                                                                                                   |
|------------------------------|---------|--------------------------------------------------------------------------------------------------------------------------------------------------------------------------------------------------------------------------------------------------------------------------------------------------------------------------------------------------------------------------------------------------------------------------------------------------------------------------------------------------------------------------------------------------------------------------------------------------------------------------------------------------------------------------------------------------|
| <b>Title and abstract</b>    | 1       | (a) Indicate the study's design with a commonly used term in the title or the abstract<br>(b) Provide in the abstract an informative and balanced summary of what was done and what was found                                                                                                                                                                                                                                                                                                                                                                                                                                                                                                    |
| <b>Introduction</b>          |         |                                                                                                                                                                                                                                                                                                                                                                                                                                                                                                                                                                                                                                                                                                  |
| Background/rationale         | 2       | Explain the scientific background and rationale for the investigation being reported                                                                                                                                                                                                                                                                                                                                                                                                                                                                                                                                                                                                             |
| Objectives                   | 3       | State specific objectives, including any prespecified hypotheses                                                                                                                                                                                                                                                                                                                                                                                                                                                                                                                                                                                                                                 |
| <b>Methods</b>               |         |                                                                                                                                                                                                                                                                                                                                                                                                                                                                                                                                                                                                                                                                                                  |
| Study design                 | 4       | Present key elements of study design early in the paper                                                                                                                                                                                                                                                                                                                                                                                                                                                                                                                                                                                                                                          |
| Setting                      | 5       | Describe the setting, locations, and relevant dates, including periods of recruitment, exposure, follow-up, and data collection                                                                                                                                                                                                                                                                                                                                                                                                                                                                                                                                                                  |
| Participants                 | 6       | (a) <i>Cohort study</i> —Give the eligibility criteria, and the sources and methods of selection of participants. Describe methods of follow-up<br><i>Case-control study</i> —Give the eligibility criteria, and the sources and methods of case ascertainment and control selection. Give the rationale for the choice of cases and controls<br><i>Cross-sectional study</i> —Give the eligibility criteria, and the sources and methods of selection of participants<br>(b) <i>Cohort study</i> —For matched studies, give matching criteria and number of exposed and unexposed<br><i>Case-control study</i> —For matched studies, give matching criteria and the number of controls per case |
| Variables                    | 7       | Clearly define all outcomes, exposures, predictors, potential confounders, and effect modifiers. Give diagnostic criteria, if applicable                                                                                                                                                                                                                                                                                                                                                                                                                                                                                                                                                         |
| Data sources/<br>measurement | 8*      | For each variable of interest, give sources of data and details of methods of assessment (measurement). Describe comparability of assessment methods if there is more than one group                                                                                                                                                                                                                                                                                                                                                                                                                                                                                                             |
| Bias                         | 9       | Describe any efforts to address potential sources of bias                                                                                                                                                                                                                                                                                                                                                                                                                                                                                                                                                                                                                                        |
| Study size                   | 10      | Explain how the study size was arrived at                                                                                                                                                                                                                                                                                                                                                                                                                                                                                                                                                                                                                                                        |
| Quantitative variables       | 11      | Explain how quantitative variables were handled in the analyses. If applicable, describe which groupings were chosen and why                                                                                                                                                                                                                                                                                                                                                                                                                                                                                                                                                                     |
| Statistical methods          | 12      | (a) Describe all statistical methods, including those used to control for confounding<br>(b) Describe any methods used to examine subgroups and interactions<br>(c) Explain how missing data were addressed<br>(d) <i>Cohort study</i> —If applicable, explain how loss to follow-up was addressed<br><i>Case-control study</i> —If applicable, explain how matching of cases and controls was addressed<br><i>Cross-sectional study</i> —If applicable, describe analytical methods taking account of sampling strategy<br>(e) Describe any sensitivity analyses                                                                                                                                |

Continued on next page

**Results**

|                  |     |                                                                                                                                                                                                                                                                                                                                                                                                               |
|------------------|-----|---------------------------------------------------------------------------------------------------------------------------------------------------------------------------------------------------------------------------------------------------------------------------------------------------------------------------------------------------------------------------------------------------------------|
| Participants     | 13* | (a) Report numbers of individuals at each stage of study—eg numbers potentially eligible, examined for eligibility, confirmed eligible, included in the study, completing follow-up, and analysed<br>(b) Give reasons for non-participation at each stage<br>(c) Consider use of a flow diagram                                                                                                               |
| Descriptive data | 14* | (a) Give characteristics of study participants (eg demographic, clinical, social) and information on exposures and potential confounders<br>(b) Indicate number of participants with missing data for each variable of interest<br>(c) <i>Cohort study</i> —Summarise follow-up time (eg, average and total amount)                                                                                           |
| Outcome data     | 15* | <i>Cohort study</i> —Report numbers of outcome events or summary measures over time<br><i>Case-control study</i> —Report numbers in each exposure category, or summary measures of exposure<br><i>Cross-sectional study</i> —Report numbers of outcome events or summary measures                                                                                                                             |
| Main results     | 16  | (a) Give unadjusted estimates and, if applicable, confounder-adjusted estimates and their precision (eg, 95% confidence interval). Make clear which confounders were adjusted for and why they were included<br>(b) Report category boundaries when continuous variables were categorized<br>(c) If relevant, consider translating estimates of relative risk into absolute risk for a meaningful time period |
| Other analyses   | 17  | Report other analyses done—eg analyses of subgroups and interactions, and sensitivity analyses                                                                                                                                                                                                                                                                                                                |

**Discussion**

|                  |    |                                                                                                                                                                            |
|------------------|----|----------------------------------------------------------------------------------------------------------------------------------------------------------------------------|
| Key results      | 18 | Summarise key results with reference to study objectives                                                                                                                   |
| Limitations      | 19 | Discuss limitations of the study, taking into account sources of potential bias or imprecision. Discuss both direction and magnitude of any potential bias                 |
| Interpretation   | 20 | Give a cautious overall interpretation of results considering objectives, limitations, multiplicity of analyses, results from similar studies, and other relevant evidence |
| Generalisability | 21 | Discuss the generalisability (external validity) of the study results                                                                                                      |

**Other information**

|         |    |                                                                                                                                                               |
|---------|----|---------------------------------------------------------------------------------------------------------------------------------------------------------------|
| Funding | 22 | Give the source of funding and the role of the funders for the present study and, if applicable, for the original study on which the present article is based |
|---------|----|---------------------------------------------------------------------------------------------------------------------------------------------------------------|

\*Give information separately for cases and controls in case-control studies and, if applicable, for exposed and unexposed groups in cohort and cross-sectional studies.

**Note:** An Explanation and Elaboration article discusses each checklist item and gives methodological background and published examples of transparent reporting. The STROBE checklist is best used in conjunction with this article (freely available on the Web sites of PLoS Medicine at <http://www.plosmedicine.org/>, Annals of Internal Medicine at <http://www.annals.org/>, and Epidemiology at <http://www.epidem.com/>). Information on the STROBE Initiative is available at [www.strobe-statement.org](http://www.strobe-statement.org).



**DISABILITY PENSION AMONG YOUNG WOMEN IN SWEDEN,  
WITH SPECIAL EMPHASIS ON FAMILY STRUCTURE: A  
DYNAMIC COHORT STUDY**

|                                 |                                                                                                                                                                                                                                                                                                                                                                                                                                                                                                                                                                                 |
|---------------------------------|---------------------------------------------------------------------------------------------------------------------------------------------------------------------------------------------------------------------------------------------------------------------------------------------------------------------------------------------------------------------------------------------------------------------------------------------------------------------------------------------------------------------------------------------------------------------------------|
| Journal:                        | <i>BMJ Open</i>                                                                                                                                                                                                                                                                                                                                                                                                                                                                                                                                                                 |
| Manuscript ID:                  | bmjopen-2012-000840.R1                                                                                                                                                                                                                                                                                                                                                                                                                                                                                                                                                          |
| Article Type:                   | Research                                                                                                                                                                                                                                                                                                                                                                                                                                                                                                                                                                        |
| Date Submitted by the Author:   | 20-Feb-2012                                                                                                                                                                                                                                                                                                                                                                                                                                                                                                                                                                     |
| Complete List of Authors:       | Floderus, Birgitta; Karolinska Institutet, Dpt of Clinical Neuroscience, Div. of Insurance Medicine<br>Hagman, Maud; Karolinska Institutet, Dpt of Clinical Neuroscience, Div. of Insurance Medicine<br>Aronsson, Gunnar; Stockholm University, Dpt of Psychology<br>Gustafsson, Klas; Karolinska Institutet, Dpt of Clinical Neuroscience, Div. of Insurance Medicine<br>Marklund, Staffan; Karolinska Institutet, Dpt of Clinical Neuroscience, Div. of Insurance Medicine<br>Wikman, Anders; Karolinska Institutet, Dpt of Clinical Neuroscience, Div. of Insurance Medicine |
| <b>Primary Subject Heading</b>: | Epidemiology                                                                                                                                                                                                                                                                                                                                                                                                                                                                                                                                                                    |
| Secondary Subject Heading:      | Epidemiology, Public health                                                                                                                                                                                                                                                                                                                                                                                                                                                                                                                                                     |
| Keywords:                       | EPIDEMIOLOGY, PUBLIC HEALTH, SOCIAL MEDICINE                                                                                                                                                                                                                                                                                                                                                                                                                                                                                                                                    |
|                                 |                                                                                                                                                                                                                                                                                                                                                                                                                                                                                                                                                                                 |

SCHOLARONE™  
Manuscripts

1  
2  
3  
4  
5  
6 **DISABILITY PENSION AMONG YOUNG WOMEN IN SWEDEN, WITH**  
7 **SPECIAL EMPHASIS ON FAMILY STRUCTURE ~~AND SICKNESS ABSENCE~~:**  
8 **A DYNAMIC COHORT STUDY**  
9

10  
11  
12  
13 Birgitta Floderus<sup>1</sup>, Maud Hagman<sup>1</sup>, Gunnar Aronsson<sup>2</sup>, Klas Gustafsson<sup>1</sup>, Staffan  
14 Marklund<sup>1</sup>, Anders Wikman<sup>1</sup>

15  
16 <sup>1</sup>Department of Clinical Neuroscience, Division of Insurance Medicine, Karolinska  
17 Institutet, Stockholm, Sweden

18 <sup>2</sup>Department of Psychology, Stockholm University, Stockholm, Sweden  
19

20  
21  
22  
23  
24  
25 Corresponding author: Birgitta Floderus, Department of Clinical Neuroscience,  
26 Division of Insurance Medicine, Karolinska Institutet, S-171 77 Stockholm, Sweden,  
27 phone:+46 8 5248 3259, fax:+46 8 5248 3205  
28

29  
30 Words: ~~3299~~2915

31  
32 Tables: ~~4~~3

33  
34 Figures: 1  
35

36  
37 Subject headings: Disability pension, family structure, ~~sickness absence~~, women  
38

39  
40 Running head: Disability pension among young women  
41  
42  
43  
44  
45  
46  
47  
48  
49  
50  
51  
52  
53  
54  
55  
56  
57  
58  
59  
60

Contributorship statement:

Floderus B: Contributing to conception and design, acquisition of data, analysis and interpretation of data. Drafting the article.

Hagman M: Main contributor to acquisition of data and analysis.

Aronsson G: Contributing to analysis and interpretation of data. Revising the article critically for important intellectual content.

Gustafsson K: Contributing to analysis and interpretation of data. Revising the article critically for important intellectual content.

Marklund S: Contributing to analysis and interpretation of data. Revising the article critically for important intellectual content.

Wikman A: Contributing to analysis and interpretation of data. Revising the article critically for important intellectual content.

All authors have approved of this version (2012-01-16) of the article.

## ARTICLE SUMMARY

### Article focus:

- Explanations of the increasing rate of disability pension (DP) in young women in European countries.
- High demands due to family structure and work was expected to be a contributing factor.
- ~~A clear relation between DP and illness, measured by medically certified sickness absence was anticipated.~~

### Key messages:

- Parenthood contributed to an increased risk of going on DP among young women. Lone working women with children had an increased risk of DP in both a one- and five-year perspective. Cohabiting working women with children had a lower risk of DP than other cohabiting women in a one-year perspective, while the opposite was shown in a five-year follow-up.
- The number of children among working women tended to increase the risk of DP five years later.
- ~~Medically certified long term sickness absence was an exceptionally strong predictor of going on DP irrespective of age, demographic, and socioeconomic status.~~

### Strengths:

- High representativity due to the population based study group and high statistical precision due to the study size.

- The possibility to utilize different time spans of follow-up and to ~~adapt to~~adjust for changes in the exposure and confounding factors during follow up.

#### Limitations:

- Lack of information on the diagnoses of disability pension.
- Lack of information on full time or part-time work.
- The generalizability is restricted to countries with a welfare system similar to that of Sweden, although the knowledge could also be a pointer for other countries developing or changing their welfare system.
- A similar study based on men is warranted.

#### DATA SHARING STATEMENT

In principle, data from the Swedish national registries are available to anyone within or outside the country who can present valid research funding and ethical approval of the research. Questions can be addressed to Statistics Sweden.



**ABSTRACT**

**Objectives:** The influence of family structure on the risk of going on disability pension (DP) was investigated among young women by analyzing its short- and long-term effect, controlling for potential confounding and the “healthy mother effect.” ~~Further, the relation between medically certified sickness absence and DP was explored.~~

**Design and Participants:** This dynamic cohort study comprised all women born in Sweden between 1960 and 1979 (1.2 million), ~~who were~~ 20-43 years of age during follow-up. Their annual data were retrieved from national registers for the years 1993–2003. For this period, data on family structure, ~~sickness absence,~~ and potential confounders were related to the incidence of DP one year after the exposure assessment. Using a modified version of the COX proportional hazard regression, we took into account changes in the study variables of individuals over the years. In addition, a five-year follow up was used.

**Results:** Cohabiting working women with children ran a decreased risk of DP compared to ~~other~~ cohabiting working women ~~without children~~ in the one-year follow up, while the opposite was indicated in the five-year follow up. Lone working women with children showed an increased risk of DP in both the one- and five-year follow up. The risk of DP tended to increase with the number of children five years earlier for both cohabiting and lone working women. ~~Long term sickness absence was an exceptionally strong predictor of DP irrespective of age, demographic, and socioeconomic status.~~

**Conclusions:** The study suggests that parenthood contributes to increasing the risk of going on DP among young women, which should be valuable knowledge to employers and other policy makers. ~~It remains to be analyzed to what extent The the~~ high numbers of young women exiting from working life may be counteracted by a) extended gender

Formatted: Font: Not Italic

1  
2  
3  
4  
5 equality, b) fewer work hours among fathers and mothers of young children, and c) by  
6  
7 financial support to lone women with children.  
8  
9  
10  
11  
12  
13  
14  
15  
16  
17  
18  
19  
20  
21  
22  
23  
24  
25  
26  
27  
28  
29  
30  
31  
32  
33  
34  
35  
36  
37  
38  
39  
40  
41  
42  
43  
44  
45  
46  
47  
48  
49  
50  
51  
52  
53  
54  
55  
56  
57  
58  
59  
60

For peer review only

## INTRODUCTION

The exiting from working life due to reduced work capacity that has been occurring in Sweden and other OECD countries has entailed a heavy socioeconomic burden.<sup>1,2</sup>

There is a shift in many countries in the gender structure of disability pensioners. The rates of DP tend to increase more (or fall less) in women, implying that women increases their share of new beneficiaries.<sup>3</sup> A marked increase in the number of young individuals on ~~disability pension (DP)~~ DP based on psychiatric diagnoses has been observed, which has been most pronounced among young women.<sup>3</sup> The incidence in Swedish women aged 16-64 the incidence of DP among women with psychiatric diagnoses ~~tripled was 15 per 10<sup>4</sup> person years in Sweden between 1998 and 53 per 10<sup>4</sup> in 2005~~2004, while ~~m~~ Men showed an two-fold increase increase from 14 to 30 per 10<sup>4</sup> person years during the same period.<sup>4</sup> Since 2004, the numbers-inflow of new DPs have declined for the population as a whole, but the downward trend does not apply to individuals below 30 years of age, according to the Swedish Social Insurance Agency.<sup>5</sup> The long-term development has not been linear because of changes in the labor market along with changes in the criteria for being granted a DP. Also, in other Nordic countries with comparable social security systems, more and more young women have been granted a DP.<sup>6-8</sup>

In previous studies we have analyzed self-reported health<sup>9,10</sup> and sickness absence<sup>11</sup> among young women with the purposes of testing the hypothesis that their work- and career-related demands along with the demands of their family life overextended their personal resources and thus contributed to impaired health and well-being. The first two studies on self-reported health were cross-sectional and based on face to face interviews. The third study with sickness absence as a measure of ill health was based

Formatted: Superscript

Formatted: Superscript

Formatted: Superscript

Formatted: Superscript

1  
2  
3  
4  
5  
6 on registry data with a prospective approach. The main finding was that the risk of  
7 sickness absence was higher in working mothers compared to those without children.<sup>11</sup>

8  
9 The present study is an extension of these studies, and the main objective was to explore  
10 the potential influence of family structure on the risk of being granted a DP among  
11 young women. Registry data were studied prospectively, and we analyzed short-term  
12 and long-term effects controlling for potential confounding factors and the possibility of  
13 a “healthy mother effect”.  
14  
15  
16  
17  
18  
19

## 20 21 22 23 **STUDY POPULATION AND METHODS**

24  
25 The study base was comprised of all of the women in Sweden born between 1960 and  
26 1979 who had reached the age of 20 at base-line, which occurred between 1993 and  
27 2003. The dynamic cohort consisted of 1,218,094 women who were between 20 and 43  
28 years old during the follow up period. Data were retrieved from central registers  
29 integrated in the Longitudinal database for health insurance and labor market studies  
30 (LISA).  
31  
32  
33  
34  
35  
36  
37

### 38 **Outcome**

39  
40 *Disability pension* could either be full time or part time. Participants were recorded as  
41 being on DP the (first) year it was granted to them. In most cases, the women who went  
42 on DPs during the study period were issued permanent DPs. The diminished health and  
43 work capacity that is grounds for a DP in Sweden is assessed through different types of  
44 systematic medical examinations that have been approved of through Swedish social  
45 security legislation.  
46  
47  
48  
49  
50  
51  
52

### 53 **Exposures**

1  
2  
3  
4  
5  
6 *Family structure* was based on partner status and whether there were any children in the  
7 home who were 18 years old or younger. Cohabitation meant either married or  
8 cohabiting with children in common. Thus, if they were cohabiting without children in  
9 common they were classified as lone. Four categories (cohabiting with children,  
10 cohabiting without children, lone with children, and lone without children) were used.  
11  
12 In a separate analysis, we also considered the number of children 18 years or younger  
13 (no children, one child, two children, and three or more children). ~~*Sickness absence*~~  
14 ~~(with sickness benefits) was treated as an exposure variable and comprised a medically~~  
15 ~~certified sickness absence exceeding 14 days of sick leave from work. Sick leaves of~~  
16 ~~fewer than 14 days are covered by the employer and such days are not included in the~~  
17 ~~registration kept by the Social Insurance Agency. For each person and year, the total~~  
18 ~~number of sickness absence days with sickness benefits from the insurance agency was~~  
19 ~~calculated, and classified into: no days, 1–30, 31–90, 91–180, 181–300, and 301–365~~  
20 ~~days. If one is unemployed, benefits from the Social Insurance Agency are paid from~~  
21 ~~the second day, which causes a lack of comparability between employed and~~  
22 ~~unemployed. Because of the very close relation between sickness absence and receiving~~  
23 ~~DP, sickness absence was excluded from the multivariate analyses of family structure.~~

#### 40 **Potential confounders**

41  
42  
43 The following potential confounders were considered:

44  
45  
46 *Employment* was broken down into employed (including self-employed) according to  
47 one's income tax declaration (showing a registered employer), and not employed,  
48 indicated by not having returned a tax declaration with a registered employer. We used  
49 the term "not employed" instead of "unemployed" to separate the category from the  
50 variable below: days of unemployment part of the year (see below). To reduce potential

1  
2  
3  
4  
5 effects from parental leave, the women were classified as employed for the year of a  
6 birth if they were recorded as employed the year before as well as the year after the  
7 delivery. The analyses were stratified according to employment status because not all of  
8 the potential confounders were relevant for women without employment, and because  
9 of inconsistent measurements of sickness absence.  
10  
11  
12  
13  
14

15  
16 *Days of unemployment* was able to be assessed among women who had been employed  
17 sometime in the same year in which they became unemployed. The variable measured  
18 the number of days the individual had received unemployment benefits, 0 (reference),  
19 1–15, 16–30, 31–60, and more than 60 days.  
20  
21  
22  
23  
24

25 *Sector of employment* was also restricted to women classified as employed. It was  
26 divided into four groupings: national-level public sector (reference), local- and county-  
27 level public sector, private sector, and “other.”  
28  
29  
30  
31

32 *Country of birth* originally included 37 different countries that were collapsed into 19  
33 (Table 1) and subsequently into three more general categories: Sweden (reference),  
34 Nordic countries other than Sweden, and countries outside the Nordic region.  
35  
36  
37

38 *Residential area* was separated according to population density: metropolitan areas, city  
39 areas, rural areas, and sparsely populated areas (reference).  
40  
41

42 Other potential confounders were *Education*, divided into 9 years or less, 10–12 years,  
43 and more than 12 years (reference); annual *Income* was classified, with cut-off points at  
44 the first and third quartiles, into low, medium, and high income (reference). In 1998, the  
45 values at the two cut-off points were approximately € 9,200 and € 14,200, respectively.  
46  
47  
48  
49  
50

## 51 **Statistical methods**

52  
53  
54  
55  
56  
57  
58  
59  
60

1  
2  
3  
4  
5  
6 The analytical approach of the present study was to account for the way in which  
7 individuals' exposure variables and potential confounders changed over time. The  
8 analyses were based on the SAS MPHREG macro developed at the Channing  
9  
10 Laboratory.<sup>12</sup>The program has been used in other studies:<sup>11, 13, 14</sup> and the current  
11 application is analogous to the proportional hazard regression with time dependent  
12 repeated measurements with a counting process style of input. The difference from a  
13 traditional Cox proportional hazard regression ~~was is~~ that the ~~units of observation did~~  
14 ~~not correspond to individuals~~ calculus was not based on the individuals' continuous time  
15 lines. Instead, an individual data record was created for each year in which the  
16 participant was at risk of receiving a DP, which allowed the individuals to change risk  
17 category status on an annual basis. ~~study variables to change value each year of exposure~~  
18 ~~classification.~~ With this method, all of an individual's changes regarding, for example,  
19 family composition structure or level of education, ~~could be was~~ accounted for across  
20 time. The ~~number of person years at risk for an exposure risk category categories in of~~ a  
21 certain year ~~was were~~ linked to DP/no DP in a subsequent year. The hazard ratio (HR)  
22 for the total follow-up period was estimated by the pooled HR across the years with a  
23 95% confidence interval. A joint control for age and calendar year was built into the  
24 program.

25  
26  
27  
28  
29  
30  
31  
32  
33  
34  
35  
36  
37  
38  
39  
40  
41  
42 Two time-spans of follow up were used, one year and five years, to study the predictive  
43 value of the exposure variables – with a short (just before the decision of being granted  
44 a DP). and with a longer time of action.

45  
46  
47  
48  
49 *One-year follow up:* The ~~exposure classification~~ risk categorization was started in 1993  
50 or the year of entry into the cohort, ~~provided that the woman had reached the age of~~  
51 20. Follow up was discontinued at the year of DP, emigration, death or end of 2003.  
52  
53  
54

Formatted: Font: (Default) Times New Roman, 12 pt

1  
2  
3  
4  
5  
6 ~~whichever came first. Individuals were censored at the year of DP, emigration, or death.~~

7  
8 Women with a DP at baseline were excluded.

9  
10 *Five-year follow up:* The exposure variables (family structure ~~and sickness absence~~),  
11 ~~were was~~ analyzed in a five-year follow up, using a similar methodology as in the one-  
12 year follow up. For each year for which a five-year follow up was possible (1993–  
13 year follow up. For each year for which a five-year follow up was possible (1993–  
14 1998), individual's exposure values were assessed and linked to their case status (DP/no  
15 DP) five years later. Individuals who received a DP or who emigrated or died during the  
16 five-year period were not taken into account for this follow-up period or the following  
17 periods. ~~Further~~

18  
19  
20  
21  
22  
23  
24  
25 In an additional analysis, the women were required to be “healthy” at base line in order  
26 to reduce the possibility of ~~reversed causation~~ selection bias (i.e., ill health influencing  
27 exposure). This was ~~fulfilled done~~ by a restriction of the study base not having to women  
28 without a registered sickness absence during the three-year period preceding the year of  
29 exposure classification. The ~~requirement restriction~~ was mainly meant to reduce the  
30 “healthy mother effect.”<sup>9</sup> Sickness absence (with sickness benefits) was treated as an  
31 exposure variable and comprised corresponded to a medically certified sickness absence  
32 exceeding 14 days of sick leave from work. Sick leaves of fewer than 14 days are  
33 covered by the employer and such days are not included in the registration kept by the  
34 Social Insurance Agency were not considered.

Formatted: Font: Not Italic

## 49 RESULTS

### 50 Exploration of potential confounders (Table 1, 2)



1  
2  
3  
4  
5 From 1993 to 2003, 39,605 women aged 20 to 43 were granted a DP, corresponding to a  
6 rate of 39 per 10<sup>4</sup> person years; 4,345 DPs were granted to 20 to 25 year old women.  
7

8  
9 The rate increased with increasing age. DP was most common in rural areas and least  
10 common in metropolitan areas. Country of birth showed a considerable variation, with  
11 the highest rates for those born in Greece, Lebanon-Syria-Turkey, and the former  
12 Yugoslavia. The lowest rates were found for women born in the US, the UK/Ireland,  
13 East Asia including Thailand and Vietnam, and Western Europe including Germany  
14 (Table 1).  
15  
16  
17  
18  
19  
20

21  
22 Women with low education were found to have an incidence of DP that was five times  
23 higher than for those with high education, and the same increase was found when  
24 comparing those who were not employed with those who were employed. Those  
25 employed in the national-level public sector had the highest incidence of DP, while the  
26 lowest rate was found for women in private employment. Number of days of  
27 unemployment tended to show an inverse relation to the risk of being granted a DP the  
28 following year. When it came to income, the rates were observed to increase as income  
29 level decreased (Table 1).  
30  
31  
32  
33  
34  
35  
36  
37  
38

39 There was no remarkable difference between the crude rates for cohabiting and lone  
40 women, but the age-adjusted HR showed an 80 percent increase in risk for the lone  
41 women. Women with children had a somewhat higher crude rate of DP, but the age-  
42 adjusted results showed the opposite, a decreased HR compared to women without  
43 children. The crude relative rates increased by number of children, but controlling for  
44 age decreased HRs were seen for one or more children, with the lowest HR for two  
45 children (Table 1).  
46  
47  
48  
49  
50  
51  
52  
53  
54

1  
2  
3  
4  
5  
6 A powerful association was found between number of days of sickness absence in a  
7 year and the risk of receiving a DP the following year. HRs started to increase  
8 substantially at the level of 31–90 days of sickness absence and went up dramatically at  
9 higher levels (Table 1).  
10  
11  
12

13  
14 Multivariate models for predicting DP that included potential confounders were  
15 computed for employed and not employed women (Table 2). In employed the  
16 increasing risk of DP with age and the reversed association with days of unemployment  
17 was strengthened after control for other confounders, while the associations with low  
18 education and low income were somewhat weakened.  
19  
20  
21  
22  
23

24  
25 Among the employed, women born in countries outside of the Nordic region had a  
26 slightly higher adjusted risk of DP compared to women born in Sweden. Among women  
27 without employment, however, there was a markedly lower risk of receiving a DP for  
28 those who were born in these countries as compared to those born in Sweden. A  
29 decreased HR was also seen for not employed women from the Nordic countries (Table  
30 2).  
31  
32  
33  
34  
35  
36

37  
38 The results of the investigation of potential confounding factors caused us to keep all  
39 the variables in the multivariate analyses of family structure and sickness absence.  
40  
41

#### 42 **Family structure and disability pension (Table 3)**

43  
44  
45 As can be seen in Table 1, it was apparent that being lone, and having no children were  
46 both related to increased HRs of DP. In the multivariate analyses, the variables of  
47 partner status and children were combined, and “cohabiting women without children”  
48 was used as the reference category (Table 3).  
49  
50  
51  
52  
53  
54

1  
2  
3  
4  
5  
6 In the one-year follow up, the risk of DP among cohabiting women with children was  
7 lower than that of the reference group, regardless of employment status. A similar result  
8 emerged for the two types of models (adjusting for age only, and the full multivariate  
9 model). Overall, lone women showed higher HRs than cohabiting women, and among  
10 employed lone women, the HR was highest for those who had children. On the other  
11 hand, among lone women with no employment, the HR was highest for those with no  
12 children (Table 3).  
13  
14  
15  
16  
17  
18  
19

20 In the five-year follow up, the pattern changed. Among both lone and cohabiting  
21 women, the HRs of receiving a DP tended to increase for women with children. This  
22 tendency was seen among both employed and not employed women. The pattern was  
23 similar for the two types of models, but the estimates were lower in the full multivariate  
24 models. The HRs of the full model were strengthened after controlling for health at the  
25 start of follow up, which ~~limited the women~~ implied a restriction of the study group to  
26 those who had not had a medically certified sickness absence within the three years  
27 prior to the assessment of family structure (Table 3).  
28  
29  
30  
31  
32  
33  
34  
35  
36

37 To further explore the validity of the effect of living with children, in the five-year  
38 follow up, we added an analysis of the number of children based on the full model  
39 controlling for health at baseline (Figure 1). The results suggested that the risk of DP  
40 increased with number of children for both lone and cohabiting working women,  
41 especially among lone working women. Among women without an employment, there  
42 was only a weak indication in the same direction among cohabiting women.  
43  
44  
45  
46  
47  
48  
49

50 Sickness absence and disability pension (Table 4)  
51  
52  
53  
54  
55

1  
2  
3  
4  
5  
6 In the one-year follow up, a close relation between sickness absence and the risk of DP  
7 was apparent. The stratification according to employment showed that the association  
8 was particularly pronounced among the employed women, and that the figures only  
9 changed marginally in the multivariate analysis. It can also be noted that comparatively  
10 few days of sickness absence in a year (0-30 days) were predictive of DP in the  
11 following year, controlling for demographic and socioeconomic factors (Table 4).  
12  
13  
14  
15  
16  
17

18 In the five-year follow up, the predictive strength of sickness absence was attenuated  
19 but still evident, with a four to five fold increase in the risk of DP at the level of 31-90  
20 days of sickness absence, and a thirty-fold increase for the highest level of absence  
21 among employed women. Controlling for the potential confounders produced only  
22 minor changes (Table 4).  
23  
24  
25  
26  
27  
28  
29  
30  
31

## 32 DISCUSSION

33  
34 Because of the size of the study base, there was a high degree of representativity and  
35 statistical precision. This also allowed us to evaluate the importance of different time  
36 spans between exposure and outcome. Potential confounding factors were considered,  
37 and an attempt was made to reduce the possibility of selection bias – that the exposure  
38 status could be caused by foregoing impaired health. The chosen methodology took into  
39 account changes in individuals' exposure variables (and covariates); ~~in in all the~~ one-  
40 year follow-up analyses- this was done on an annual basis.  
41  
42  
43  
44  
45  
46  
47  
48  
49

50 The relations between family structure and DP were inconsistent and varied according  
51 to employment status and the time of follow up. In the one-year follow up, cohabiting  
52 women with children had the lowest risk of receiving a DP, with only a marginal  
53  
54

1  
2  
3  
4  
5  
6 difference being observed between the employed and unemployed. Lone women with  
7  
8 children in the home had the highest HR among employed women, while those lone  
9  
10 without children showed the highest HR among those who were not employed. In the  
11  
12 five-year follow up, on the other hand, living with children contributed in a consistent  
13  
14 way to increasing the risk of later DP, particularly among working women.

15  
16 The results for cohabiting mothers suggest that living with children was related to a  
17  
18 beneficial health effect in the short term, which may be explained by a protective effect  
19  
20 of social integration provided by living with a partner and children, which in turn can be  
21  
22 due to a-uncontrolled selection bias, a “healthy mother effect”. On the other hand, in the  
23  
24 five-year follow up, the cohabiting mothers were at a higher risk of receiving a DP  
25  
26 compared to those without children. A portion of the cohabiting women who divorced  
27  
28 within the five-year follow-up period may have experienced a difficult divorce or other  
29  
30 setback, and this could possibly have been more common among mothers or particularly  
31  
32 vulnerable mothers. Those who divorced during this follow up were thus  
33  
34 “misclassified” part of the five-year follow-up period and their risk of DP may come  
35  
36 closer to the pattern of single mothers (in the one-year follow up such misclassification  
37  
38 was avoided). Lone working mothers had the highest risk of DP both in the short- and  
39  
40 long-term, which is in line with expectations. Previous studies have clearly pointed out  
41  
42 the vulnerability of this group<sup>15, 16</sup>, which may be explained by the heavy workload and  
43  
44 greater responsibility that is shouldered by many of these women. The reasons behind  
45  
46 the relatively high risk of receiving a DP that was found among lone women who were  
47  
48 not employed and without children are not clear, but it is plausible that it may be  
49  
50 connected to these individuals suffering from social isolation or marginalization that  
51  
52 may have been the result of severe illness or handicap early in life.<sup>17</sup> Analyses of the  
53  
54

1  
2  
3  
4  
5  
6 medical diagnoses related to the DP could have helped explain these findings, but,  
7  
8 unfortunately, such information on diagnosis-specific DP was not available for use in  
9  
10 the study.

11  
12 In the five-year follow up, we could at base line control for a bias that we have  
13  
14 encountered in previous studies – the “healthy mother effect”, by the requirement that  
15  
16 all individuals should be “healthy” during the three year period preceding the exposure  
17  
18 assessment. In the one-year follow up, where the exposure was assessed very close in  
19  
20 time to the outcome, a comparable analysis seemed less appropriate. The requirement of  
21  
22 no sickness absence so close in time to the DP should entail a selection of specific DP  
23  
24 diagnoses where injuries and accidents in particular would remain.

25  
26  
27 ~~The five-year predictive value of days of sickness absence was evident, and it was even~~  
28  
29 ~~stronger in the one year follow up, which demonstrates the importance of the aspect of~~  
30  
31 ~~health for the developments leading up to DP, as well as the impact that the length of~~  
32  
33 ~~follow up has on the estimate. It was obvious that the link between sickness absence and~~  
34  
35 ~~DP varies according to the time span between the two measurements, and long-term~~  
36  
37 ~~sickness absence seems to be a precipitating factor for receiving a DP. The strong~~  
38  
39 ~~association found between sickness absence and receiving a DP was consistent with~~  
40  
41 ~~previous findings from Sweden and other Nordic countries, including studies of~~  
42  
43 ~~municipal employees in Finland<sup>18</sup>, of employees from the private sector in Denmark,<sup>19</sup>~~  
44  
45 ~~and of representative subpopulations in Sweden<sup>20</sup>. The transition from sickness absence~~  
46  
47 ~~to DP has also been previously studied among individuals who all had a long-term~~  
48  
49 ~~sickness absence<sup>e.g., 21, 22</sup>. To the best of our knowledge, no study has focused on young~~  
50  
51 ~~women in particular, the group with the largest increase in DP during the last decades.~~  
52  
53  
54

1  
2  
3  
4  
5 The results show the complexity of the relation between family structure and DP. A  
6 considerable part of the social expenses due to DP should be attributed to lone working  
7 women with children. Their decreased work capacity may be explained by a heavy total  
8 workload and shortage of time, and may have health implications not only for the  
9 mothers but probably also for the children. The increased risk of receiving a DP among  
10 lone women without children and without a job could indicate that detrimental  
11 marginalization or social isolation is contributing to their work incapacity. Further,  
12 future studies should address the question about the potential health effects that may  
13 affect women who transition from cohabiting mothers to lone mothers. Studies similar  
14 to the present but with a focus on men are also warranted.  
15  
16  
17  
18  
19  
20  
21  
22  
23  
24  
25  
26  
27  
28  
29

### 30 **FUNDING**

31  
32 The study was supported by the Swedish Council for Working Life and Social  
33 Research, Grant nr 2009-0453.  
34  
35  
36  
37  
38  
39

### 40 **COMPETING INTEREST**

41  
42 The authors declare no conflicts of interest.  
43  
44  
45  
46  
47

### 48 **STUDY APPROVAL**

49  
50 The study was approved by the regional research ethics committee in Stockholm (Dnr:  
51 2010/176-31/5).  
52  
53  
54

**FIGURE LEGEND**

Figure 1. Relative risks of going on DP according to family structure among employed and not employed women: a five-year follow up, excluding those with sickness absence within the three years before base line, and controlling for potential confounders.

For peer review only



Table 1. Demographic factors, socioeconomic factors, and days of sickness absence related to disability pension in the one-year follow up during 1993–2003 among women in Sweden aged 20–43 years and born between 1960–1979.

|                                                               | Person<br>years | Crude<br>rate <sup>a</sup> | Crude<br>relative<br>rate | Exp.<br>cases | HR <sup>b</sup> | (95% CI) |      |
|---------------------------------------------------------------|-----------------|----------------------------|---------------------------|---------------|-----------------|----------|------|
| Total                                                         | 10278639        | 39                         |                           | 39605         |                 |          |      |
| <b>Age group</b> <b>Ages during follow up</b>                 |                 |                            |                           |               |                 |          |      |
| 20–25 years                                                   | 2909604         | 15                         | 1.00                      | 4345          | 1.00            |          |      |
| 26–30 years                                                   | 2964268         | 26                         | 1.75                      | 7755          | 1.66            | 1.60     | 1.72 |
| 31–35 years                                                   | 2814482         | 47                         | 3.14                      | 13218         | 2.92            | 2.82     | 3.02 |
| 36+ years                                                     | 1590285         | 90                         | 6.02                      | 14287         | 4.54            | 4.38     | 4.71 |
| <b>Residential area</b>                                       |                 |                            |                           |               |                 |          |      |
| Sparsely populated areas                                      | 497386          | 44                         | 1.00                      | 2166          | 1.00            |          |      |
| Rural areas                                                   | 507730          | 54                         | 1.25                      | 2755          | 1.28            | 1.21     | 1.35 |
| City areas                                                    | 5159644         | 41                         | 0.94                      | 21061         | 0.97            | 0.93     | 1.01 |
| Metropolitan areas                                            | 4111669         | 33                         | 0.76                      | 13621         | 0.78            | 0.74     | 0.82 |
| <b>Country of birth</b>                                       |                 |                            |                           |               |                 |          |      |
| Sweden                                                        | 8807028         | 37                         | 1.00                      | 32678         | 1.00            |          |      |
| Denmark, Finland, Norway, Iceland                             | 268139          | 53                         | 1.43                      | 1425          | 1.20            | 1.13     | 1.26 |
| United Kingdom and Ireland                                    | 18296           | 21                         | 0.56                      | 38            | 0.49            | 0.36     | 0.68 |
| Poland                                                        | 62449           | 47                         | 1.26                      | 293           | 1.14            | 1.02     | 1.28 |
| Eastern Europe incl. Romania,<br>Hungary, former DDR and USSR | 76647           | 30                         | 0.81                      | 229           | 0.71            | 0.62     | 0.80 |
| Bosnia-Herzegovina                                            | 79481           | 35                         | 0.94                      | 276           | 0.83            | 0.74     | 0.94 |
| Former Yugoslavia excl. Bosnia-<br>Herzegovina                | 104404          | 76                         | 2.05                      | 794           | 1.72            | 1.60     | 1.84 |
| Greece                                                        | 11761           | 121                        | 3.25                      | 142           | 2.72            | 2.31     | 3.21 |
| Western Europe incl. Germany                                  | 48946           | 25                         | 0.67                      | 121           | 0.60            | 0.50     | 0.71 |
| Iraq                                                          | 67727           | 42                         | 1.13                      | 283           | 0.98            | 0.87     | 1.10 |
| Lebanon, Syria, and Turkey                                    | 143657          | 84                         | 2.26                      | 1204          | 2.24            | 2.12     | 2.38 |
| South Central Asia incl. Iran                                 | 140861          | 53                         | 1.43                      | 746           | 1.34            | 1.25     | 1.44 |
| Ethiopia and Somalia                                          | 57713           | 25                         | 0.69                      | 147           | 0.69            | 0.59     | 0.81 |
| Africa excl. Ethiopia and Somalia                             | 61247           | 46                         | 1.25                      | 283           | 1.12            | 1.00     | 1.26 |
| East Asia incl. Thailand and Vietnam                          | 144465          | 23                         | 0.61                      | 327           | 0.59            | 0.53     | 0.65 |
| USA                                                           | 25521           | 15                         | 0.41                      | 39            | 0.37            | 0.27     | 0.50 |
| Chile                                                         | 49665           | 48                         | 1.29                      | 237           | 1.27            | 1.12     | 1.44 |
| South America excl. Chile                                     | 40229           | 32                         | 0.87                      | 130           | 0.84            | 0.71     | 1.00 |
| Other Countries                                               | 70403           | 30                         | 0.82                      | 213           | 0.75            | 0.66     | 0.86 |
| <b>Education</b>                                              |                 |                            |                           |               |                 |          |      |
| High, more than 12 years                                      | 3208713         | 17                         | 1.00                      | 5313          | 1.00            |          |      |
| Medium, 10–12 years                                           | 5674755         | 40                         | 2.40                      | 22577         | 2.72            | 2.64     | 2.80 |
| Low, 9 years or less                                          | 1369063         | 83                         | 5.04                      | 11418         | 5.97            | 5.78     | 6.17 |

|    |                                |         |      |        |       |        |        |        |
|----|--------------------------------|---------|------|--------|-------|--------|--------|--------|
| 1  |                                |         |      |        |       |        |        |        |
| 2  |                                |         |      |        |       |        |        |        |
| 3  |                                |         |      |        |       |        |        |        |
| 4  |                                |         |      |        |       |        |        |        |
| 5  |                                |         |      |        |       |        |        |        |
| 6  |                                |         |      |        |       |        |        |        |
| 7  | Employment                     |         |      |        |       |        |        |        |
| 8  | Employed                       | 8724849 | 23   | 1.00   | 19645 | 1.00   |        |        |
| 9  | Not employed                   | 1553790 | 128  | 5.71   | 19960 | 6.76   | 6.63   | 6.90   |
| 10 | Employment sector              |         |      |        |       |        |        |        |
| 11 | National public sector         | 672544  | 30   | 1.00   | 2042  | 1.00   |        |        |
| 12 | Local and County public sector | 3417883 | 25   | 0.83   | 8649  | 0.83   | 0.79   | 0.88   |
| 13 | Private sector                 | 4082880 | 18   | 0.60   | 7435  | 0.66   | 0.63   | 0.70   |
| 14 | Other sector                   | 517698  | 29   | 0.95   | 1498  | 1.06   | 0.99   | 1.13   |
| 15 |                                |         |      |        |       |        |        |        |
| 16 | Days of unemployment           |         |      |        |       |        |        |        |
| 17 | 0 days                         | 7570643 | 42   | 1.00   | 31486 | 1.00   |        |        |
| 18 | 1–15 days                      | 273581  | 41   | 0.98   | 1114  | 1.25   | 1.18   | 1.33   |
| 19 | 16–30 days                     | 238987  | 31   | 0.74   | 738   | 1.03   | 0.95   | 1.11   |
| 20 | 31–60 days                     | 425404  | 28   | 0.68   | 1206  | 0.95   | 0.90   | 1.01   |
| 21 | >60 days                       | 1770024 | 29   | 0.69   | 5061  | 0.95   | 0.92   | 0.98   |
| 22 |                                |         |      |        |       |        |        |        |
| 23 | Income                         |         |      |        |       |        |        |        |
| 24 | High, above 3rd quartile       | 2600723 | 34   | 1.00   | 8721  | 1.00   |        |        |
| 25 | Medium, 1st–3rd quartile       | 4937461 | 41   | 1.21   | 20095 | 1.59   | 1.55   | 1.63   |
| 26 | Low, below 1st quartile        | 2554492 | 41   | 1.23   | 10559 | 2.32   | 2.25   | 2.39   |
| 27 |                                |         |      |        |       |        |        |        |
| 28 | Partner status                 |         |      |        |       |        |        |        |
| 29 | Cohabiting                     | 4750441 | 36   | 1.00   | 17304 | 1.00   |        |        |
| 30 | Lone                           | 5528198 | 40   | 1.11   | 22301 | 1.82   | 1.79   | 1.86   |
| 31 |                                |         |      |        |       |        |        |        |
| 32 | Children                       |         |      |        |       |        |        |        |
| 33 | Without (no) children          | 4886709 | 32   | 1.00   | 15464 | 1.00   |        |        |
| 34 | With children                  | 5391930 | 45   | 1.41   | 24141 | 0.74   | 0.72   | 0.76   |
| 35 |                                |         |      |        |       |        |        |        |
| 36 | Number of children             |         |      |        |       |        |        |        |
| 37 | No Children                    | 4886709 | 33   | 1.00   | 15464 | 1.00   |        |        |
| 38 | One child                      | 1769317 | 38   | 1.16   | 6463  | 0.76   | 0.74   | 0.79   |
| 39 | Two children                   | 2504169 | 42   | 1.30   | 10573 | 0.66   | 0.65   | 0.68   |
| 40 | Three or more children         | 1118444 | 64   | 1.95   | 7105  | 0.88   | 0.85   | 0.91   |
| 41 | Days of sickness absence       | -       | -    | -      | -     | -      | -      | -      |
| 42 | 0 days                         | 8741046 | 9    | 1.00   | 7432  | 1.00   | -      | -      |
| 43 | 1–30 days                      | 795630  | 9    | 1.02   | 688   | 1.03   | 0.95   | 1.11   |
| 44 | 31–90 days                     | 368512  | 36   | 4.20   | 1317  | 4.17   | 3.93   | 4.42   |
| 45 | 91–180 days                    | 171430  | 154  | 18.08  | 2635  | 17.68  | 16.90  | 18.49  |
| 46 | 181–300 days                   | 98877   | 639  | 75.20  | 6322  | 71.22  | 68.79  | 73.73  |
| 47 | 301–365 days                   | 103144  | 2056 | 241.87 | 21211 | 222.30 | 216.07 | 228.71 |

<sup>a</sup> Number of new disability pensions per 10,000 person years.

<sup>b</sup> Adjusted for age.

Table 2. Multivariate analyses relating the demographic and socioeconomic factors to disability pension in the one-year follow up during 1993-2003 among the employed and not employed women.

|                                   | Employed     |                 |           | Not employed |                 |           |
|-----------------------------------|--------------|-----------------|-----------|--------------|-----------------|-----------|
|                                   | Exp. cases   | HR <sup>a</sup> | (95% CI)  | Exp. cases   | HR <sup>b</sup> | (95% CI)  |
| <b>Age-group</b>                  | <b>19539</b> |                 |           | <b>19742</b> |                 |           |
| <b>All ages</b>                   | <b>19539</b> |                 |           | <b>19742</b> |                 |           |
| Ages during follow up             |              |                 |           |              |                 |           |
| 20–25 years                       | 1425         | 1.00            |           | 2888         | 1.00            |           |
| 26–30 years                       | 3368         | 2.31            | 2.17 2.46 | 4342         | 1.60            | 1.53 1.68 |
| 31–35 years                       | 6795         | 4.67            | 4.40 4.96 | 6340         | 2.65            | 2.54 2.77 |
| 36+ years                         | 7951         | 7.45            | 7.00 7.93 | 6172         | 4.36            | 4.16 4.57 |
| <b>Residential area</b>           |              |                 |           |              |                 |           |
| Sparsely populated areas          | 1183         | 1.00            |           | 974          | 1.00            |           |
| Rural areas                       | 1428         | 1.30            | 1.21 1.41 | 1312         | 1.33            | 1.22 1.44 |
| City areas                        | 10341        | 0.96            | 0.91 1.02 | 10569        | 1.05            | 0.98 1.12 |
| Metropolitan areas                | 6587         | 0.86            | 0.81 0.92 | 6887         | 0.96            | 0.90 1.03 |
| <b>Country of birth</b>           |              |                 |           |              |                 |           |
| Sweden                            | 16909        | 1.00            |           | 15643        | 1.00            |           |
| Denmark, Finland, Norway, Iceland | 632          | 1.02            | 0.94 1.10 | 765          | 0.70            | 0.65 0.76 |
| Other                             | 1998         | 1.18            | 1.12 1.24 | 3334         | 0.30            | 0.29 0.32 |
| <b>Education</b>                  |              |                 |           |              |                 |           |
| High, more than 12 years          | 3406         | 1.00            |           | 1901         | 1.00            |           |
| Medium, 10–12 years               | 12034        | 2.40            | 2.31 2.50 | 10531        | 2.53            | 2.41 2.66 |
| Low, 9 years or less              | 4099         | 4.91            | 4.69 5.15 | 7310         | 3.61            | 3.43 3.80 |
| <b>Income</b>                     |              |                 |           |              |                 |           |
| High, above 3rd quartile          | 5511         | 1.00            |           |              |                 |           |
| Medium, 1st-3rd quartile          | 11262        | 1.31            | 1.26 1.35 |              |                 |           |
| Low, below 1st quartile           | 2766         | 1.38            | 1.31 1.45 |              |                 |           |
| <b>Employment sector</b>          |              |                 |           |              |                 |           |
| National public sector            | 2027         | 1.00            |           |              |                 |           |
| Local and county public sector    | 8619         | 0.74            | 0.70 0.78 |              |                 |           |
| Private sector                    | 7403         | 0.53            | 0.50 0.56 |              |                 |           |
| Other sector                      | 1490         | 0.93            | 0.87 0.99 |              |                 |           |
| <b>Days of unemployment</b>       |              |                 |           |              |                 |           |
| 0 days                            | 16629        | 1.00            |           |              |                 |           |
| 1–15 days                         | 447          | 0.91            | 0.83 1.00 |              |                 |           |
| 16–30 days                        | 294          | 0.77            | 0.69 0.87 |              |                 |           |
| 31–60 days                        | 470          | 0.71            | 0.65 0.78 |              |                 |           |
| >60 days                          | 1699         | 0.70            | 0.66 0.73 |              |                 |           |

Formatted Table

<sup>a</sup> The model included age, residential area, country of birth, education, income, employment sector, and days of unemployment.

<sup>b</sup> The model included age, residential area, country of birth, and education.

Table 3. Multivariate analyses relating family structure to disability pension in the one-year and five-year follow up during 1993-2003 among employed and not employed women.

|                                                             | Employed   |      |           | Not employed |      |           |
|-------------------------------------------------------------|------------|------|-----------|--------------|------|-----------|
|                                                             | Exp. cases | HR   | (95% CI)  | Exp. cases   | HR   | (95% CI)  |
| <b>One-year follow up</b>                                   |            |      |           |              |      |           |
| Family structure <sup>a</sup>                               |            |      |           |              |      |           |
| Total                                                       | 19645      |      |           | 19960        |      |           |
| Cohabiting+no children                                      | 785        | 1.00 |           | 654          | 1.00 |           |
| Cohabiting+children                                         | 9320       | 0.80 | 0.74 0.86 | 6545         | 0.88 | 0.81 0.96 |
| Lone+no children                                            | 5853       | 1.08 | 1.00 1.17 | 8172         | 2.05 | 1.89 2.22 |
| Lone+children                                               | 3687       | 1.35 | 1.25 1.46 | 4589         | 1.64 | 1.51 1.78 |
| Family structure <sup>b</sup>                               |            |      |           |              |      |           |
| Total                                                       | 19539      |      |           | 19742        |      |           |
| Cohabiting+no children                                      | 780        | 1.00 |           | 648          | 1.00 |           |
| Cohabiting+children                                         | 9268       | 0.73 | 0.68 0.78 | 6460         | 0.63 | 0.59 0.69 |
| Lone+no children                                            | 5835       | 1.07 | 0.99 1.16 | 8099         | 1.35 | 1.24 1.46 |
| Lone+children                                               | 3656       | 1.23 | 1.14 1.33 | 4535         | 0.99 | 0.91 1.08 |
| <b>Five-year follow up</b>                                  |            |      |           |              |      |           |
| Family structure <sup>a</sup>                               |            |      |           |              |      |           |
| Total                                                       | 20170      |      |           | 9598         |      |           |
| Cohabiting+no children                                      | 616        | 1.00 |           | 241          | 1.00 |           |
| Cohabiting+children                                         | 9893       | 1.31 | 1.21 1.42 | 3954         | 1.39 | 1.22 1.58 |
| Lone+no children                                            | 5945       | 1.10 | 1.01 1.19 | 3070         | 1.89 | 1.66 2.16 |
| Lone+children                                               | 3716       | 2.35 | 2.16 2.57 | 2333         | 2.45 | 2.15 2.80 |
| Family structure <sup>b</sup>                               |            |      |           |              |      |           |
| Total                                                       | 20057      |      |           | 9598         |      |           |
| Cohabiting+no children                                      | 615        | 1.00 |           | 241          | 1.00 |           |
| Cohabiting+children                                         | 9804       | 1.13 | 1.04 1.23 | 3954         | 1.09 | 0.95 1.24 |
| Lone+no children                                            | 5938       | 1.07 | 0.98 1.16 | 3070         | 1.44 | 1.26 1.65 |
| Lone+children                                               | 3700       | 1.69 | 1.55 1.85 | 2333         | 1.62 | 1.41 1.85 |
| <b>Five-year follow up "Healthy" at start of follow up:</b> |            |      |           |              |      |           |
| Family structure <sup>b</sup>                               |            |      |           |              |      |           |
| Total                                                       | 6705       |      |           | 3871         |      |           |
| Cohabiting+no children                                      | 215        | 1.00 |           | 117          | 1.00 |           |
| Cohabiting+children                                         | 2778       | 1.24 | 1.08 1.43 | 1447         | 1.18 | 0.97 1.42 |
| Lone+no children                                            | 2618       | 1.23 | 1.07 1.42 | 1467         | 1.83 | 1.51 2.22 |
| Lone+children                                               | 1094       | 1.91 | 1.64 2.22 | 840          | 1.94 | 1.59 2.36 |

1  
2  
3  
4  
5  
6  
7  
8  
9  
10  
11  
12  
13  
14  
15  
16  
17  
18  
19  
20  
21  
22  
23  
24  
25  
26  
27  
28  
29  
30  
31  
32  
33  
34  
35  
36  
37  
38  
39  
40  
41  
42  
43  
44  
45  
46  
47  
48  
49  
50  
51  
52  
53  
54  
55  
56  
57  
58  
59  
60

a Adjusted for age.

b The model for employed included age, residential area, country of birth, education, income, employment sector, and days of unemployment. The model for not employed included age, residential area, country of birth, and education.

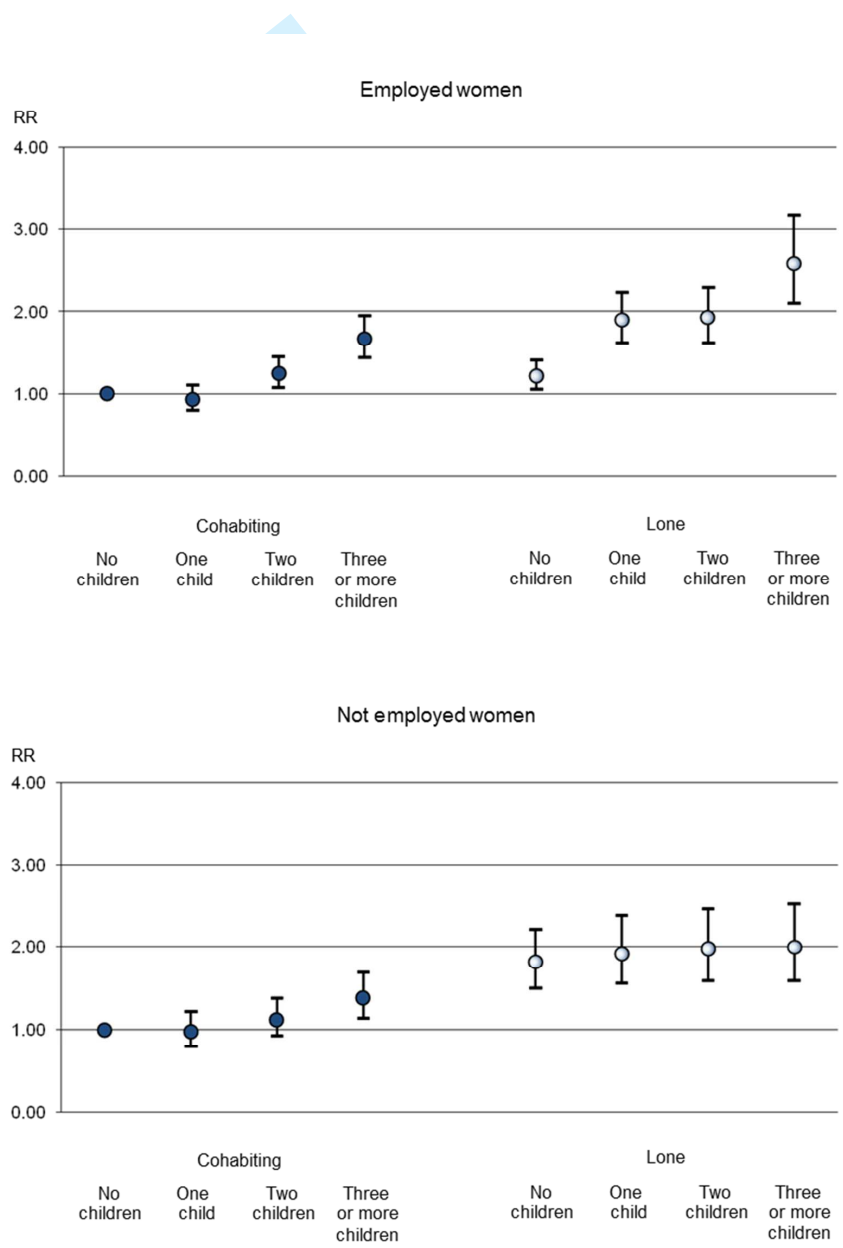

## REFERENCES

1. OECD. *Sickness, Disability and Work: Breaking the Barriers - Vol. 3: Denmark, Finland, Ireland and the Netherlands*. OECD, Paris 2008.
2. OECD. *Sickness, Disability and Work: Breaking the Barriers - Sweden: Will the recent reforms make it?* OECD, Paris 2009.
3. OECD. *Sickness, Disability and Work: Breaking the Barriers - A Synthesis of Findings across OECD Countries*, OECD, Paris 2010.
4. Försäkringskassan (The Swedish Social Insurance Agency). *Diagnosmönster i förändring - nybeviljade förtidspensioner, sjukersättningar och aktivitetsersättningar 1971 - 2005*. [Changing Diagnostic Patterns – Newly Granted Disability Pensions, Sickness and Rehabilitation Allowances 1971–2005 ] Försäkringskassan Redovisar 2007:3, Stockholm 2007. (In Swedish)
5. Försäkringskassan (The Swedish Social Insurance Agency). *Social insurance in figures 2008*. Försäkringskassan 2009, Stockholm 2009.
6. Bjørngaard JH, Krokstad S, Johnsen R et al. *Epidemiologisk forskning om uførepensjon i Norden*. [Epidemiological Research on Disability Pensions in the Nordic Countries] *Norsk Epidemiologi* 2009;19:103-114. (Review in Norwegian)
7. Thorlacius S, Stefánsson SB, Olafsson S et al. *Increased incidence of disability due to mental and behavioural disorders in Iceland 1990-2007*. *J Mental Health* 2010;19(2):176-183.

- 1  
2  
3  
4  
5  
6  
7  
8  
9 8. Gjesdal S, Lie RT, Maeland JG. Variations in the risk of disability pension in Norway  
10 1970-99. A gender-specific age-period-cohort analysis. *Scand J Public Health*  
11 2004;32(5):340-348.  
12
- 13  
14 9. Floderus B, Hagman M, Aronsson G et al. Self-reported health in mothers: the impact of  
15 age, and socioeconomic conditions. *Women Health* 2008;47(2):63-86.  
16
- 17 10. Floderus B, Hagman M, Aronsson G et al. Work status, work hours and health in women  
18 with and without children. *Occup Environ Med* 2009;66(10):704-710.  
19
- 20 11. Floderus B, Hagman M, Aronsson G et al. Medically certified sickness absence with  
21 insurance benefits in women with and without children. *Eur J Public Health* 2011 (open  
22 access publication).  
23
- 24 12. Hertzmark E, Spiegelman D. The SAS MPHREG macro. Boston, MA: Channing  
25 Laboratory, 2001.  
26
- 27 13. Wise LA, Palmer JR, Harlow BL et al. Reproductive factors, hormonal contraception,  
28 and risk of uterine leiomyomata in African-American women: A prospective study. *Am*  
29 *J Epidemiol* 2004;159:113-123.  
30
- 31 14. Boynton-Jarrett R, Rich-Edwards J, Malspeis S et al. A prospective study of  
32 hypertension and risk of uterine leiomyomata. *Am J Epidemiol* 2005; 161:628-638.  
33
- 34 15. Benzeval M. The self-reported health status of lone parents. *Soc Sci Med*  
35 1998;46(10):1337-1353.  
36
- 37 16. Burstrom B, Whitehead M, Clayton S et al. Health inequalities between lone and couple  
38 mothers and policy under different welfare regimes - The example of Italy, Sweden and  
39 Britain. *Soc Sci Med* 2010;70:912-920.  
40  
41  
42  
43  
44  
45  
46  
47  
48  
49  
50  
51  
52  
53

1  
2  
3  
4  
5  
6  
7  
8  
9 17. Gravseth HM, Bjerkedal T, Irgens LM et al. Life course determinants for early disability  
10 pension: a follow-up of Norwegian men and women born 1967-1976. *Eur J Epidemiol*  
11 2007;22:533-543.  
12

13  
14  
15 ~~18. Kivimäki M, Forma P, Wikström J et al. Sickness absence as a risk marker of future  
16 disability pension: the 10-town study. *J Epidemiol Community Health* 2004;58(8):710-  
17 711.  
18~~

19  
20  
21 ~~19. Lund T, Kivimäki M, Labriola M et al. Using administrative sickness absence data as a  
22 marker of future disability pension: the prospective DREAM study of Danish private sector  
23 employees. *Occup Environ Med* 2008;65(1):28-31. Epub 2007 July 11.  
24~~

25  
26  
27 ~~20. Wallman T, Wedel H, Palmer E et al. Sick leave track record and other potential  
28 predictors of a disability pension. A population based study of 8,218 men and women  
29 followed for 16 years. *BMC Public Health* 2009;9:104.  
30~~

31  
32  
33 ~~21. Borg K, Hensing G, Alexanderson K. Predictive factors for disability pension—an 11-  
34 year follow up of young persons on sick leave due to neck, shoulder, or back diagnoses.  
35 *Scand J Public Health* 2001;29(2):104-112.  
36~~

37  
38  
39 ~~22. Gjesdal S, Bratberg E. The role of gender in long term sickness absence and transition to  
40 permanent disability benefits. Results from a multiregister based, prospective study in  
41 Norway 1990-1995. *Eur J Public Health* 2002;12(3):180-186.  
42  
43  
44  
45  
46  
47  
48  
49  
50  
51  
52  
53  
54~~

Formatted: Indent: Left: 0.25", No bullets or numbering



## STROBE Statement—checklist of items that should be included in reports of observational studies

|                              | Item No | Recommendation                                                                                                                                                                                                                                                                                                                                                                                                                                                                                                                                                                                                                                                                                   |
|------------------------------|---------|--------------------------------------------------------------------------------------------------------------------------------------------------------------------------------------------------------------------------------------------------------------------------------------------------------------------------------------------------------------------------------------------------------------------------------------------------------------------------------------------------------------------------------------------------------------------------------------------------------------------------------------------------------------------------------------------------|
| <b>Title and abstract</b>    | 1       | (a) Indicate the study's design with a commonly used term in the title or the abstract<br>(b) Provide in the abstract an informative and balanced summary of what was done and what was found                                                                                                                                                                                                                                                                                                                                                                                                                                                                                                    |
| <b>Introduction</b>          |         |                                                                                                                                                                                                                                                                                                                                                                                                                                                                                                                                                                                                                                                                                                  |
| Background/rationale         | 2       | Explain the scientific background and rationale for the investigation being reported                                                                                                                                                                                                                                                                                                                                                                                                                                                                                                                                                                                                             |
| Objectives                   | 3       | State specific objectives, including any prespecified hypotheses                                                                                                                                                                                                                                                                                                                                                                                                                                                                                                                                                                                                                                 |
| <b>Methods</b>               |         |                                                                                                                                                                                                                                                                                                                                                                                                                                                                                                                                                                                                                                                                                                  |
| Study design                 | 4       | Present key elements of study design early in the paper                                                                                                                                                                                                                                                                                                                                                                                                                                                                                                                                                                                                                                          |
| Setting                      | 5       | Describe the setting, locations, and relevant dates, including periods of recruitment, exposure, follow-up, and data collection                                                                                                                                                                                                                                                                                                                                                                                                                                                                                                                                                                  |
| Participants                 | 6       | (a) <i>Cohort study</i> —Give the eligibility criteria, and the sources and methods of selection of participants. Describe methods of follow-up<br><i>Case-control study</i> —Give the eligibility criteria, and the sources and methods of case ascertainment and control selection. Give the rationale for the choice of cases and controls<br><i>Cross-sectional study</i> —Give the eligibility criteria, and the sources and methods of selection of participants<br>(b) <i>Cohort study</i> —For matched studies, give matching criteria and number of exposed and unexposed<br><i>Case-control study</i> —For matched studies, give matching criteria and the number of controls per case |
| Variables                    | 7       | Clearly define all outcomes, exposures, predictors, potential confounders, and effect modifiers. Give diagnostic criteria, if applicable                                                                                                                                                                                                                                                                                                                                                                                                                                                                                                                                                         |
| Data sources/<br>measurement | 8*      | For each variable of interest, give sources of data and details of methods of assessment (measurement). Describe comparability of assessment methods if there is more than one group                                                                                                                                                                                                                                                                                                                                                                                                                                                                                                             |
| Bias                         | 9       | Describe any efforts to address potential sources of bias                                                                                                                                                                                                                                                                                                                                                                                                                                                                                                                                                                                                                                        |
| Study size                   | 10      | Explain how the study size was arrived at                                                                                                                                                                                                                                                                                                                                                                                                                                                                                                                                                                                                                                                        |
| Quantitative variables       | 11      | Explain how quantitative variables were handled in the analyses. If applicable, describe which groupings were chosen and why                                                                                                                                                                                                                                                                                                                                                                                                                                                                                                                                                                     |
| Statistical methods          | 12      | (a) Describe all statistical methods, including those used to control for confounding<br>(b) Describe any methods used to examine subgroups and interactions<br>(c) Explain how missing data were addressed<br>(d) <i>Cohort study</i> —If applicable, explain how loss to follow-up was addressed<br><i>Case-control study</i> —If applicable, explain how matching of cases and controls was addressed<br><i>Cross-sectional study</i> —If applicable, describe analytical methods taking account of sampling strategy<br>(e) Describe any sensitivity analyses                                                                                                                                |

Continued on next page

**Results**

|                  |     |                                                                                                                                                                                                                                                                                                                                                                                                               |
|------------------|-----|---------------------------------------------------------------------------------------------------------------------------------------------------------------------------------------------------------------------------------------------------------------------------------------------------------------------------------------------------------------------------------------------------------------|
| Participants     | 13* | (a) Report numbers of individuals at each stage of study—eg numbers potentially eligible, examined for eligibility, confirmed eligible, included in the study, completing follow-up, and analysed<br>(b) Give reasons for non-participation at each stage<br>(c) Consider use of a flow diagram                                                                                                               |
| Descriptive data | 14* | (a) Give characteristics of study participants (eg demographic, clinical, social) and information on exposures and potential confounders<br>(b) Indicate number of participants with missing data for each variable of interest<br>(c) <i>Cohort study</i> —Summarise follow-up time (eg, average and total amount)                                                                                           |
| Outcome data     | 15* | <i>Cohort study</i> —Report numbers of outcome events or summary measures over time<br><i>Case-control study</i> —Report numbers in each exposure category, or summary measures of exposure<br><i>Cross-sectional study</i> —Report numbers of outcome events or summary measures                                                                                                                             |
| Main results     | 16  | (a) Give unadjusted estimates and, if applicable, confounder-adjusted estimates and their precision (eg, 95% confidence interval). Make clear which confounders were adjusted for and why they were included<br>(b) Report category boundaries when continuous variables were categorized<br>(c) If relevant, consider translating estimates of relative risk into absolute risk for a meaningful time period |
| Other analyses   | 17  | Report other analyses done—eg analyses of subgroups and interactions, and sensitivity analyses                                                                                                                                                                                                                                                                                                                |

**Discussion**

|                  |    |                                                                                                                                                                            |
|------------------|----|----------------------------------------------------------------------------------------------------------------------------------------------------------------------------|
| Key results      | 18 | Summarise key results with reference to study objectives                                                                                                                   |
| Limitations      | 19 | Discuss limitations of the study, taking into account sources of potential bias or imprecision. Discuss both direction and magnitude of any potential bias                 |
| Interpretation   | 20 | Give a cautious overall interpretation of results considering objectives, limitations, multiplicity of analyses, results from similar studies, and other relevant evidence |
| Generalisability | 21 | Discuss the generalisability (external validity) of the study results                                                                                                      |

**Other information**

|         |    |                                                                                                                                                               |
|---------|----|---------------------------------------------------------------------------------------------------------------------------------------------------------------|
| Funding | 22 | Give the source of funding and the role of the funders for the present study and, if applicable, for the original study on which the present article is based |
|---------|----|---------------------------------------------------------------------------------------------------------------------------------------------------------------|

\*Give information separately for cases and controls in case-control studies and, if applicable, for exposed and unexposed groups in cohort and cross-sectional studies.

**Note:** An Explanation and Elaboration article discusses each checklist item and gives methodological background and published examples of transparent reporting. The STROBE checklist is best used in conjunction with this article (freely available on the Web sites of PLoS Medicine at <http://www.plosmedicine.org/>, Annals of Internal Medicine at <http://www.annals.org/>, and Epidemiology at <http://www.epidem.com/>). Information on the STROBE Initiative is available at [www.strobe-statement.org](http://www.strobe-statement.org).



**DISABILITY PENSION AMONG YOUNG WOMEN IN SWEDEN,  
WITH SPECIAL EMPHASIS ON FAMILY STRUCTURE: A  
DYNAMIC COHORT STUDY**

|                                 |                                                                                                                                                                                                                                                                                                                                                                                                                                                                                                                                                                                 |
|---------------------------------|---------------------------------------------------------------------------------------------------------------------------------------------------------------------------------------------------------------------------------------------------------------------------------------------------------------------------------------------------------------------------------------------------------------------------------------------------------------------------------------------------------------------------------------------------------------------------------|
| Journal:                        | <i>BMJ Open</i>                                                                                                                                                                                                                                                                                                                                                                                                                                                                                                                                                                 |
| Manuscript ID:                  | bmjopen-2012-000840.R2                                                                                                                                                                                                                                                                                                                                                                                                                                                                                                                                                          |
| Article Type:                   | Research                                                                                                                                                                                                                                                                                                                                                                                                                                                                                                                                                                        |
| Date Submitted by the Author:   | 27-Apr-2012                                                                                                                                                                                                                                                                                                                                                                                                                                                                                                                                                                     |
| Complete List of Authors:       | Floderus, Birgitta; Karolinska Institutet, Dpt of Clinical Neuroscience, Div. of Insurance Medicine<br>Hagman, Maud; Karolinska Institutet, Dpt of Clinical Neuroscience, Div. of Insurance Medicine<br>Aronsson, Gunnar; Stockholm University, Dpt of Psychology<br>Gustafsson, Klas; Karolinska Institutet, Dpt of Clinical Neuroscience, Div. of Insurance Medicine<br>Marklund, Staffan; Karolinska Institutet, Dpt of Clinical Neuroscience, Div. of Insurance Medicine<br>Wikman, Anders; Karolinska Institutet, Dpt of Clinical Neuroscience, Div. of Insurance Medicine |
| <b>Primary Subject Heading</b>: | Epidemiology                                                                                                                                                                                                                                                                                                                                                                                                                                                                                                                                                                    |
| Secondary Subject Heading:      | General practice / Family practice, Public health, Occupational and environmental medicine                                                                                                                                                                                                                                                                                                                                                                                                                                                                                      |
| Keywords:                       | EPIDEMIOLOGY, PUBLIC HEALTH, SOCIAL MEDICINE                                                                                                                                                                                                                                                                                                                                                                                                                                                                                                                                    |
|                                 |                                                                                                                                                                                                                                                                                                                                                                                                                                                                                                                                                                                 |

SCHOLARONE™  
Manuscripts

**ABSTRACT**

Objectives: The influence of family structure on the risk of going on disability pension (DP) was investigated among young women by analyzing a short- and long-term effect, controlling for potential confounding and the “healthy mother effect.”

Design and Participants: This dynamic cohort study comprised all women born in Sweden between 1960 and 1979 (1.2 million), who were 20-43 years of age during follow-up. Their annual data were retrieved from national registers for the years 1993–2003. For this period, data on family structure, and potential confounders were related to the incidence of DP the year after the exposure assessment. Using a modified version of the COX proportional hazard regression, we took into account changes in the study variables of individuals over the years. In addition, a five-year follow up was used.

Results: Cohabiting, working women with children showed a decreased risk of DP in a one-year perspective compared to cohabiting working women with no children, while the opposite was indicated in the five-year follow up. Lone, working women with children had an increased risk of DP in both the short- and long-term perspective. The risk of DP tended to increase with the number of children for both cohabiting and lone working women in the five-year follow up.

Conclusions: The study suggests that parenthood contributes to increasing the risk of going on DP among young women, which should be valuable knowledge to employers and other policy makers. It remains to be analyzed to what extent the high numbers of young women exiting from working life may be counteracted by a) extended gender equality, b) fewer work hours among fathers and mothers of young children, and c) by financial support to lone women with children.

## INTRODUCTION

The exiting from working life due to reduced work capacity that has been occurring in Sweden and other OECD countries has entailed a heavy socioeconomic burden.<sup>1-3</sup> In many countries a shift in the gender structure of disability pensioners has occurred. The rates of DP tend to increase more (or fall less) in women, implying that women increase their share of new beneficiaries.<sup>3</sup> A marked increase in the number of young individuals on DP based on psychiatric diagnoses has been observed, which has been most pronounced among young women.<sup>3-4</sup> This trend has been particularly pronounced in Sweden and was an incentive for the present study focusing on young women (Figure 1). The long-term development has not been linear because of changes in the labor market along with changes in the criteria for being granted a DP. Since 2004, the numbers of new DPs have declined for the population as a whole, but the downward trend does not apply to individuals below 30 years of age, according to the Swedish Social Insurance Agency.<sup>5</sup> Also, in other Nordic countries more and more young women have been granted a DP.<sup>6-8</sup>

The time trends may to some extent be related to health effects among women combining a demanding work and a family life with children. Different measures have been used to study the so called “double burden” hypothesis: multiple roles, paid and unpaid work, work-to-family and family-to-work conflicts (spillover). The outcome measures as well as methodology have varied extensively, e.g. 9-13 and many but not all studies<sup>14-15</sup> have supported the hypothesis.

With respect to DP, studies have reported results on marital status and prevalence of children in relation to risk of DP,<sup>16</sup> often based on individuals initially on long-term sick leave<sup>17-20</sup> and without a simultaneous consideration of work status. To the best of our

1  
2  
3 knowledge this is the first study analyzing the effect of family structure and work on  
4  
5 DP, based on a representative group of young women.  
6

7  
8 Previously, we have analyzed self-reported health<sup>21-22</sup> and sickness absence<sup>23</sup> among  
9  
10 young women with the purposes of testing the hypothesis that their work- and career-  
11  
12 related demands along with the demands of their family life overextended their personal  
13  
14 resources and thus contributed to impaired health and well-being. The first two studies  
15  
16 were cross-sectional and based on face to face interviews. They showed that women  
17  
18 with children more often than others reported poor health. The associations were most  
19  
20 pronounced among full time workers<sup>21</sup>, but did also apply to students and job seekers<sup>22</sup>.  
21  
22  
23 The third study with sickness absence as a measure of ill health was based on registry  
24  
25 data with a prospective approach. The main finding was that the risk of sickness  
26  
27 absence was higher in working mothers compared to those without children.<sup>23</sup> The  
28  
29 present study is an extension of these studies, and the main objective has been to  
30  
31 explore if the health effects previously observed could develop into illness entailing  
32  
33 reduced work capacity and DP. Registry data were studied prospectively, and we  
34  
35 analyzed short-term and long-term effects controlling for potential confounding factors  
36  
37 and the possibility of a “healthy mother effect”. The short-term follow up gives a  
38  
39 characterization of young women just before they are granted a DP, while the long-term  
40  
41 follow-up shows if family status can predict the risk of DP five years later.  
42  
43  
44  
45  
46  
47  
48

## 49 **STUDY POPULATION AND METHODS**

50  
51  
52 The study base was comprised of all of the women in Sweden born between 1960 and  
53  
54 1979 who had reached the age of 20 at base-line, which occurred between 1993 and  
55  
56  
57  
58  
59  
60

1  
2  
3 2003. The dynamic cohort consisted of 1,218,094 women who were between 20 and 43  
4  
5 years old during the follow up period. Data were retrieved from central registers  
6  
7 integrated in the Longitudinal database for health insurance and labor market studies  
8  
9 (LISA).  
10

### 11 12 **Outcome**

13  
14  
15 *Disability pension* could either be full time or part time. Participants were recorded as  
16  
17 being on DP the (first) year it was granted to them. In most cases, the women who went  
18  
19 on DPs during the study period were issued permanent DPs. The diminished health and  
20  
21 work capacity that is grounds for a DP in Sweden is assessed through different types of  
22  
23 systematic medical examinations that have been approved of through Swedish social  
24  
25 security legislation.  
26  
27  
28

### 29 30 **Exposure**

31  
32  
33 *Family structure* was based on partner status and whether there were any children in the  
34  
35 home who were 18 years old or younger. Cohabitation meant either married or  
36  
37 cohabiting with children in common. Thus, if they were cohabiting without children in  
38  
39 common they were classified as lone. The effect of this coding should be conservative  
40  
41 (working against the hypothesis). Four categories (cohabiting with children, cohabiting  
42  
43 without children, lone with children, and lone without children) were used. In a separate  
44  
45 analysis, we also considered the number of children 18 years or younger (no children,  
46  
47 one child, two children, and three or more children).  
48  
49

### 50 51 **Potential confounders**

52  
53  
54 The following potential confounders were considered:  
55  
56  
57  
58  
59  
60

1  
2  
3 *Employment* was broken down into employed (including self-employed) according to  
4 one's income tax declaration (showing a registered employer), and not employed,  
5 indicated by not having returned a tax declaration with a registered employer. We used  
6 the term "not employed" instead of "unemployed" to separate the category from the  
7 variable below: days of unemployment part of the year (see below). To reduce potential  
8 effects from parental leave, the women were classified as employed for the year of a  
9 birth if they were recorded as employed the year before as well as the year after the  
10 delivery. The analyses were stratified according to employment status because not all of  
11 the potential confounders were relevant for women without employment, and because  
12 of inconsistent measurements of sickness absence.  
13  
14  
15  
16  
17  
18  
19  
20  
21  
22  
23  
24  
25

26 *Days of unemployment* was assessed among women who had been employed sometime  
27 in the same year in which they became unemployed. The variable measured the number  
28 of days the individual had received unemployment benefits, 0 (reference), 1–15, 16–30,  
29 31–60, and more than 60 days.  
30  
31  
32  
33  
34  
35

36 *Sector of employment* was also restricted to women classified as employed. It was  
37 divided into four groupings: national-level public sector (reference), local- and county-  
38 level public sector, private sector, and "other."  
39  
40  
41  
42

43 *Country of birth* originally included 37 different countries that were collapsed into 19  
44 (Table 1) and subsequently into three more general categories: Sweden (reference),  
45 Nordic countries other than Sweden, and countries outside the Nordic region.  
46  
47  
48

49 *Residential area* was separated according to population density: metropolitan areas, city  
50 areas, rural areas, and sparsely populated areas (reference).  
51  
52  
53  
54  
55  
56  
57  
58  
59  
60



1  
2  
3 Other potential confounders were *Education*, divided into 9 years or less, 10–12 years,  
4 and more than 12 years (reference); annual *Income* was classified, with cut-off points at  
5 the first and third quartiles, into low, medium, and high income (reference). In 1998, the  
6 values at the two cut-off points were approximately € 9,200 and € 14,200, respectively.  
7  
8  
9

### 10 11 12 **Statistical methods**

13  
14  
15 The analytical approach of the present study was to account for the way in which  
16 individuals' exposure variables and potential confounders changed over time. The  
17 analyses were based on the SAS MPHREG macro developed at the Channing  
18 Laboratory.<sup>24</sup>The program has been used in other studies<sup>23,25-26</sup> and the current  
19 application is analogous to the proportional hazard regression with time dependent  
20 repeated measurements of time dependent variables with the counting process style of  
21 input. The importance of methodologies taking changes over time into consideration in  
22 epidemiological studies has been emphasized.<sup>27</sup>The difference from a traditional Cox  
23 proportional hazard regression was that the calculus was not based on the individuals'  
24 exposure at start of follow up. Instead, an individual data record was created for each  
25 year in which the participant was at risk of receiving a DP, which allowed the  
26 individuals to change risk category status on an annual basis. With this method, all of an  
27 individual's changes regarding, for example, family structure or level of education were  
28 accounted for across time. The risk categories of a certain year were linked to DP/no DP  
29 in a subsequent year. The hazard ratio (HR) for the total follow-up period was estimated  
30 by the pooled HR across the years with a 95% confidence interval. A joint control for  
31 age and calendar year was built into the program.  
32  
33  
34  
35  
36  
37  
38  
39  
40  
41  
42  
43  
44  
45  
46  
47  
48  
49  
50  
51  
52

53  
54 Two time-perspectives were used, a one-year follow up analysing the exposure situation  
55 just before being granted a DP, and a five-year follow up analysing the predictive value  
56  
57  
58  
59  
60

1  
2  
3 of the exposure with a longer time of action. *One-year follow up*: The risk  
4  
5 categorization was started in 1993 or the year of entry into the cohort, provided that the  
6  
7 woman had reached the age of 20. Follow up was discontinued at the year of DP,  
8  
9 emigration, death or end of 2003, whichever came first. Women with a DP at baseline  
10  
11 were excluded.  
12

13  
14  
15 *Five-year follow up*: Family structure was analyzed in the five-year follow up, using a  
16  
17 similar methodology as in the one-year follow up. For each year for which a five-year  
18  
19 follow up was possible (1993–1998), individual's exposure values were assessed and  
20  
21 linked to their case status (DP/no DP) five years later. Individuals who received a DP or  
22  
23 who emigrated or died before the end of a five-year period were deleted and also  
24  
25 excluded from further follow up.  
26  
27

28  
29 In an additional analysis, the women were required to be “healthy” at base line in order  
30  
31 to reduce the possibility of selection bias (i.e., ill health influencing exposure). This was  
32  
33 done by restricting the study base to women without a registered sickness absence  
34  
35 during the three-year period preceding the year of exposure classification. The  
36  
37 restriction was mainly meant to reduce the “healthy mother effect.”<sup>9</sup> Sickness absence  
38  
39 (with sickness benefits) corresponded to a medically certified sickness absence  
40  
41 exceeding 14 days of sick leave. Sick leaves of fewer than 14 days were not considered.  
42  
43  
44  
45  
46  
47  
48

## 49 **RESULTS**

### 50 **Exploration of potential confounders (Table 1, 2)**

51  
52  
53  
54  
55  
56  
57  
58  
59  
60

1  
2  
3 From 1993 to 2003, 39,605 women aged 20 to 43 were granted a DP, corresponding to a  
4  
5 rate of 39 per 10<sup>4</sup> person years; 4,345 DPs were granted to 20 to 25 year old women.  
6

7 The rate increased with increasing age.  
8

9  
10 DP was most common in rural areas and least common in metropolitan areas. Country  
11  
12 of birth showed a considerable variation, with the highest rates for those born in Greece,  
13  
14 Lebanon-Syria-Turkey, and the former Yugoslavia. The lowest rates were found for  
15  
16 women born in the US, the UK/Ireland, East Asia including Thailand and Vietnam, and  
17  
18 Western Europe including Germany (Table 1).  
19

20  
21  
22 Women with low education were found to have an incidence of DP that was five times  
23  
24 higher than for those with high education, and the same increase was found when  
25  
26 comparing those who were not employed with those who were employed. Those  
27  
28 employed in the national-level public sector had the highest incidence of DP, while the  
29  
30 lowest rate was found for women in private employment. Number of days of  
31  
32 unemployment tended to show an inverse relation to the risk of being granted a DP the  
33  
34 following year. When it came to income, the rates were observed to increase as income  
35  
36 level decreased (Table 1).  
37  
38

39  
40 The results caused us to keep all the variables as potential confounders in the  
41  
42 multivariate analyses of family structure.  
43  
44

#### 45 46 **Family structure and disability pension (Table 1, 2)** 47

48  
49 There was no remarkable difference between the crude rates for cohabiting and lone  
50  
51 women, but the age-adjusted HR showed an 80 percent increase in risk for the lone  
52  
53 women. Women with children had a somewhat higher crude rate of DP, but the age-  
54  
55 adjusted results showed the opposite, a decreased HR compared to women without  
56  
57

1  
2  
3 children. The crude relative rates increased by number of children, but controlling for  
4  
5 age decreased HRs were seen for one or more children, with the lowest HR for two  
6  
7 children (Table 1).  
8

9  
10 In the one-year perspective (Table 2), the risk of DP among cohabiting women with  
11  
12 children was lower than that of the reference group (cohabiting without children),  
13  
14 regardless of their working status. A similar result emerged for the two types of models  
15  
16 (adjusting for age only, and the full multivariate model). Overall, lone women showed  
17  
18 higher HRs than cohabiting women, and among employed lone women, the HR was  
19  
20 highest for those who had children. On the other hand, among lone women with no  
21  
22 employment, the HR was highest for those with no children.  
23  
24

25  
26 In the five-year follow up (Table 2), the pattern changed. Among both lone and  
27  
28 cohabiting women, the HRs of receiving a DP tended to increase for women with  
29  
30 children. This tendency was seen among both employed and not employed women. The  
31  
32 pattern was similar for the two types of models, but the estimates were lower in the full  
33  
34 multivariate models. The HRs of the full model were strengthened after controlling for  
35  
36 health at the start of follow up, which implied a restriction of the study group to those  
37  
38 who had not had a medically certified sickness absence within the three years prior to  
39  
40 the assessment of family structure..  
41  
42  
43

44  
45 To further explore the validity of the effect of living with children in the five-year  
46  
47 follow up, we added an analysis of the number of children based on the full model  
48  
49 controlling for health at baseline (Figure 2). The results suggested that the risk of DP  
50  
51 increased with number of children for both lone and cohabiting working women,  
52  
53 especially among lone working women. Among women without an employment, there  
54  
55 was only a weak indication in the same direction among cohabiting women.  
56  
57  
58

## DISCUSSION

The relations between family structure and DP were inconsistent and varied according to employment status and the time of follow up. Close in time to the outcome, cohabiting working women with children had the lowest risk of receiving a DP, while lone working women with children had the highest risk. The result was marginally changed when controlling for confounding. In the five-year follow up, on the other hand, living with children contributed in a consistent way to increasing the risk of later DP among working women.

The results for cohabiting working mothers suggested that living with children was related to a beneficial health effect when judged close in time to the outcome, which may be explained by a protective effect of social integration provided by living with a partner and children, but it may also be consequence of the short time perspective.

These living conditions may show a beneficial effect for the near future but not necessarily in the long run. This was supported by the results of the five-year follow up, where the cohabiting working mothers were at a higher risk of receiving a DP compared to those without children. A portion of the cohabiting women who divorced within the five-year follow-up period may have experienced a difficult divorce or other setback. Those who divorced during this follow up were thus “misclassified” part of the five-year period and their risk of DP may therefore come closer to the pattern of lone mothers (in the one-year follow up they were classified as lone). Lone working mothers had the highest risk of DP both in the short- and long-term, which is in line with expectations. Previous studies have clearly pointed out the vulnerability of this group,

1  
2  
3 <sup>28-29</sup> which may be explained by the heavy workload and greater responsibility that is  
4  
5 shouldered by many of these women, as well as weak financial resources.  
6  
7

8 The results suggest that the health effects observed in previous studies on this group of  
9  
10 young women<sup>21-23</sup> may develop into illness entailing reduced work capacity and DP,  
11  
12 particularly among lone working mothers.  
13  
14

15 The reasons behind the relatively high risk of receiving a DP that was found among lone  
16  
17 women who were not employed and without children are not clear, but it is plausible  
18  
19 that it may be connected to these individuals suffering from social isolation or  
20  
21 marginalization that may have been the result of severe illness or handicap early in  
22  
23 life.<sup>30-32</sup> Analyses of the medical diagnoses related to the DP could have helped explain  
24  
25 these findings, but, unfortunately, such information on diagnosis-specific DP was not  
26  
27 available for use in the study.  
28  
29  
30  
31

32 In the five-year follow up, we could at base line control for a selection bias that we have  
33  
34 encountered in previous studies – the “healthy mother effect”, implying that both  
35  
36 partner status and the prevalence of children could be influenced by preceding illness  
37  
38 causing the DP. The restriction of the study base to “healthy” women at start of a  
39  
40 follow-up period strengthened the effect of having children in both cohabiting and lone  
41  
42 working women. This suggests that selection bias should be considered in studies of  
43  
44 family structure and health. In the one-year follow up, where the exposure was assessed  
45  
46 very close in time to the outcome, a comparable analysis seemed less appropriate. The  
47  
48 requirement of no sickness absence so close in time to the DP should entail a selection  
49  
50 of specific DP diagnoses where injuries and accidents in particular would remain.  
51  
52  
53  
54  
55  
56  
57  
58  
59  
60

1  
2  
3 The results show the complexity of the relation between work-family structure and DP.  
4  
5 Because of the size of the study base, there was a high degree of representativity and  
6  
7 statistical precision. It also allowed us to evaluate the importance of different time spans  
8  
9 between exposure and outcome. Potential confounding factors were explored, and their  
10  
11 relation to DP was reported. This information adds to previous knowledge on predictors  
12  
13 of DP<sup>33,6</sup> particularly due to the high precision at hand, and the availability and use of  
14  
15 repeated measurements.  
16  
17

18  
19 A considerable part of the social expenses due to DP should be attributed to lone  
20  
21 working women with children. Their illness and decreased work capacity have  
22  
23 implications not only for the mothers but probably also for the children. The increased  
24  
25 risk of receiving a DP among lone women without children and without a job could  
26  
27 indicate a different trajectory in that marginalization or social isolation may contribute  
28  
29 to their health status and work incapacity, which needs further study. In addition, future  
30  
31 studies should address the question about the potential health effects that may affect  
32  
33 women who change their partner status from cohabiting mothers to lone mothers.  
34  
35 Studies similar to the present but with a focus on men are also warranted.  
36  
37  
38

### 39 40 **FUNDING**

41  
42 The study was supported by the Swedish Council for Working Life and Social  
43  
44 Research, Grant nr 2009-0453.  
45  
46  
47

### 48 49 **COMPETING INTEREST**

50  
51 The authors declare no conflicts of interest.  
52  
53

### 54 55 **STUDY APPROVAL**

The study was approved by the regional research ethics committee in Stockholm (Dnr: 2010/176-31/5).

## FIGURE LEGENDS

Table 1. Demographic and socioeconomic factors related to disability pension in a one-year follow up during 1993–2003 among women in Sweden aged 20–43 years and born between 1960–1979.

|                                                               | Person<br>years | Crude<br>rate <sup>a</sup> | Crude<br>relative<br>rate | Exp.<br>cases | HR <sup>b</sup> | (95% CI) |      |
|---------------------------------------------------------------|-----------------|----------------------------|---------------------------|---------------|-----------------|----------|------|
| Total                                                         | 10278639        | 39                         |                           | 39605         |                 |          |      |
| Ages during follow up                                         |                 |                            |                           |               |                 |          |      |
| 20–25 years                                                   | 2909604         | 15                         | 1.00                      | 4345          | 1.00            |          |      |
| 26–30 years                                                   | 2964268         | 26                         | 1.75                      | 7755          | 1.66            | 1.60     | 1.72 |
| 31–35 years                                                   | 2814482         | 47                         | 3.14                      | 13218         | 2.92            | 2.82     | 3.02 |
| 36+ years                                                     | 1590285         | 90                         | 6.02                      | 14287         | 4.54            | 4.38     | 4.71 |
| Residential area                                              |                 |                            |                           |               |                 |          |      |
| Sparsely populated areas                                      | 497386          | 44                         | 1.00                      | 2166          | 1.00            |          |      |
| Rural areas                                                   | 507730          | 54                         | 1.25                      | 2755          | 1.28            | 1.21     | 1.35 |
| City areas                                                    | 5159644         | 41                         | 0.94                      | 21061         | 0.97            | 0.93     | 1.01 |
| Metropolitan areas                                            | 4111669         | 33                         | 0.76                      | 13621         | 0.78            | 0.74     | 0.82 |
| Country of birth                                              |                 |                            |                           |               |                 |          |      |
| Sweden                                                        | 8807028         | 37                         | 1.00                      | 32678         | 1.00            |          |      |
| Denmark, Finland, Norway, Iceland                             | 268139          | 53                         | 1.43                      | 1425          | 1.20            | 1.13     | 1.26 |
| United Kingdom and Ireland                                    | 18296           | 21                         | 0.56                      | 38            | 0.49            | 0.36     | 0.68 |
| Poland                                                        | 62449           | 47                         | 1.26                      | 293           | 1.14            | 1.02     | 1.28 |
| Eastern Europe incl. Romania,<br>Hungary, former DDR and USSR | 76647           | 30                         | 0.81                      | 229           | 0.71            | 0.62     | 0.80 |
| Bosnia-Herzegovina                                            | 79481           | 35                         | 0.94                      | 276           | 0.83            | 0.74     | 0.94 |
| Former Yugoslavia excl. Bosnia-<br>Herzegovina                | 104404          | 76                         | 2.05                      | 794           | 1.72            | 1.60     | 1.84 |
| Greece                                                        | 11761           | 121                        | 3.25                      | 142           | 2.72            | 2.31     | 3.21 |
| Western Europe incl. Germany                                  | 48946           | 25                         | 0.67                      | 121           | 0.60            | 0.50     | 0.71 |
| Iraq                                                          | 67727           | 42                         | 1.13                      | 283           | 0.98            | 0.87     | 1.10 |
| Lebanon, Syria, and Turkey                                    | 143657          | 84                         | 2.26                      | 1204          | 2.24            | 2.12     | 2.38 |
| South Central Asia incl. Iran                                 | 140861          | 53                         | 1.43                      | 746           | 1.34            | 1.25     | 1.44 |
| Ethiopia and Somalia                                          | 57713           | 25                         | 0.69                      | 147           | 0.69            | 0.59     | 0.81 |
| Africa excl. Ethiopia and Somalia                             | 61247           | 46                         | 1.25                      | 283           | 1.12            | 1.00     | 1.26 |
| East Asia incl. Thailand and Vietnam                          | 144465          | 23                         | 0.61                      | 327           | 0.59            | 0.53     | 0.65 |
| USA                                                           | 25521           | 15                         | 0.41                      | 39            | 0.37            | 0.27     | 0.50 |
| Chile                                                         | 49665           | 48                         | 1.29                      | 237           | 1.27            | 1.12     | 1.44 |
| South America excl. Chile                                     | 40229           | 32                         | 0.87                      | 130           | 0.84            | 0.71     | 1.00 |
| Other Countries                                               | 70403           | 30                         | 0.82                      | 213           | 0.75            | 0.66     | 0.86 |



## Education

|                          |         |    |      |       |      |      |      |
|--------------------------|---------|----|------|-------|------|------|------|
| High, more than 12 years | 3208713 | 17 | 1.00 | 5313  | 1.00 |      |      |
| Medium, 10–12 years      | 5674755 | 40 | 2.40 | 22577 | 2.72 | 2.64 | 2.80 |
| Low, 9 years or less     | 1369063 | 83 | 5.04 | 11418 | 5.97 | 5.78 | 6.17 |

For peer review only

|    |                                |                                                            |     |      |       |      |      |      |
|----|--------------------------------|------------------------------------------------------------|-----|------|-------|------|------|------|
| 1  |                                |                                                            |     |      |       |      |      |      |
| 2  |                                |                                                            |     |      |       |      |      |      |
| 3  |                                |                                                            |     |      |       |      |      |      |
| 4  | Employment                     |                                                            |     |      |       |      |      |      |
| 5  | Employed                       | 8724849                                                    | 23  | 1.00 | 19645 | 1.00 |      |      |
| 6  | Not employed                   | 1553790                                                    | 128 | 5.71 | 19960 | 6.76 | 6.63 | 6.90 |
| 7  |                                |                                                            |     |      |       |      |      |      |
| 8  | Employment sector              |                                                            |     |      |       |      |      |      |
| 9  | National public sector         | 672544                                                     | 30  | 1.00 | 2042  | 1.00 |      |      |
| 10 | Local and County public sector | 3417883                                                    | 25  | 0.83 | 8649  | 0.83 | 0.79 | 0.88 |
| 11 | Private sector                 | 4082880                                                    | 18  | 0.60 | 7435  | 0.66 | 0.63 | 0.70 |
| 12 | Other sector                   | 517698                                                     | 29  | 0.95 | 1498  | 1.06 | 0.99 | 1.13 |
| 13 |                                |                                                            |     |      |       |      |      |      |
| 14 | Days of unemployment           |                                                            |     |      |       |      |      |      |
| 15 | 0 days                         | 7570643                                                    | 42  | 1.00 | 31486 | 1.00 |      |      |
| 16 | 1–15 days                      | 273581                                                     | 41  | 0.98 | 1114  | 1.25 | 1.18 | 1.33 |
| 17 | 16–30 days                     | 238987                                                     | 31  | 0.74 | 738   | 1.03 | 0.95 | 1.11 |
| 18 | 31–60 days                     | 425404                                                     | 28  | 0.68 | 1206  | 0.95 | 0.90 | 1.01 |
| 19 | >60 days                       | 1770024                                                    | 29  | 0.69 | 5061  | 0.95 | 0.92 | 0.98 |
| 20 |                                |                                                            |     |      |       |      |      |      |
| 21 |                                |                                                            |     |      |       |      |      |      |
| 22 | Income                         |                                                            |     |      |       |      |      |      |
| 23 | High, above 3rd quartile       | 2600723                                                    | 34  | 1.00 | 8721  | 1.00 |      |      |
| 24 | Medium, 1st–3rd quartile       | 4937461                                                    | 41  | 1.21 | 20095 | 1.59 | 1.55 | 1.63 |
| 25 | Low, below 1st quartile        | 2554492                                                    | 41  | 1.23 | 10559 | 2.32 | 2.25 | 2.39 |
| 26 |                                |                                                            |     |      |       |      |      |      |
| 27 | Partner status                 |                                                            |     |      |       |      |      |      |
| 28 | Cohabiting                     | 4750441                                                    | 36  | 1.00 | 17304 | 1.00 |      |      |
| 29 | Lone                           | 5528198                                                    | 40  | 1.11 | 22301 | 1.82 | 1.79 | 1.86 |
| 30 |                                |                                                            |     |      |       |      |      |      |
| 31 | Children                       |                                                            |     |      |       |      |      |      |
| 32 | Without (no) children          | 4886709                                                    | 32  | 1.00 | 15464 | 1.00 |      |      |
| 33 | With children                  | 5391930                                                    | 45  | 1.41 | 24141 | 0.74 | 0.72 | 0.76 |
| 34 |                                |                                                            |     |      |       |      |      |      |
| 35 | Number of children             |                                                            |     |      |       |      |      |      |
| 36 | No Children                    | 4886709                                                    | 33  | 1.00 | 15464 | 1.00 |      |      |
| 37 | One child                      | 1769317                                                    | 38  | 1.16 | 6463  | 0.76 | 0.74 | 0.79 |
| 38 | Two children                   | 2504169                                                    | 42  | 1.30 | 10573 | 0.66 | 0.65 | 0.68 |
| 39 | Three or more children         | 1118444                                                    | 64  | 1.95 | 7105  | 0.88 | 0.85 | 0.91 |
| 40 |                                |                                                            |     |      |       |      |      |      |
| 41 |                                |                                                            |     |      |       |      |      |      |
| 42 |                                |                                                            |     |      |       |      |      |      |
| 43 | <sup>a</sup>                   | Number of new disability pensions per 10,000 person years. |     |      |       |      |      |      |
| 44 | <sup>b</sup>                   | Adjusted for age.                                          |     |      |       |      |      |      |
| 45 |                                |                                                            |     |      |       |      |      |      |
| 46 |                                |                                                            |     |      |       |      |      |      |
| 47 |                                |                                                            |     |      |       |      |      |      |
| 48 |                                |                                                            |     |      |       |      |      |      |
| 49 |                                |                                                            |     |      |       |      |      |      |
| 50 |                                |                                                            |     |      |       |      |      |      |
| 51 |                                |                                                            |     |      |       |      |      |      |
| 52 |                                |                                                            |     |      |       |      |      |      |
| 53 |                                |                                                            |     |      |       |      |      |      |
| 54 |                                |                                                            |     |      |       |      |      |      |
| 55 |                                |                                                            |     |      |       |      |      |      |
| 56 |                                |                                                            |     |      |       |      |      |      |
| 57 |                                |                                                            |     |      |       |      |      |      |
| 58 |                                |                                                            |     |      |       |      |      |      |
| 59 |                                |                                                            |     |      |       |      |      |      |
| 60 |                                |                                                            |     |      |       |      |      |      |

Table 2. Multivariate analyses relating family structure to disability pension in a one-year and five-year follow up during 1993-2003 among employed and not employed young women.

|                                                             | Employed   |      |           | Not employed |      |           |
|-------------------------------------------------------------|------------|------|-----------|--------------|------|-----------|
|                                                             | Exp. cases | HR   | (95% CI)  | Exp. cases   | HR   | (95% CI)  |
| <b>One-year follow up</b>                                   |            |      |           |              |      |           |
| Family structure <sup>a</sup>                               |            |      |           |              |      |           |
| Total                                                       | 19645      |      |           | 19960        |      |           |
| Cohabiting+no children                                      | 785        | 1.00 |           | 654          | 1.00 |           |
| Cohabiting+children                                         | 9320       | 0.80 | 0.74 0.86 | 6545         | 0.88 | 0.81 0.96 |
| Lone+no children                                            | 5853       | 1.08 | 1.00 1.17 | 8172         | 2.05 | 1.89 2.22 |
| Lone+children                                               | 3687       | 1.35 | 1.25 1.46 | 4589         | 1.64 | 1.51 1.78 |
| Family structure <sup>b</sup>                               |            |      |           |              |      |           |
| Total                                                       | 19539      |      |           | 19742        |      |           |
| Cohabiting+no children                                      | 780        | 1.00 |           | 648          | 1.00 |           |
| Cohabiting+children                                         | 9268       | 0.73 | 0.68 0.78 | 6460         | 0.63 | 0.59 0.69 |
| Lone+no children                                            | 5835       | 1.07 | 0.99 1.16 | 8099         | 1.35 | 1.24 1.46 |
| Lone+children                                               | 3656       | 1.23 | 1.14 1.33 | 4535         | 0.99 | 0.91 1.08 |
| <b>Five-year follow up</b>                                  |            |      |           |              |      |           |
| Family structure <sup>a</sup>                               |            |      |           |              |      |           |
| Total                                                       | 20170      |      |           | 9598         |      |           |
| Cohabiting+no children                                      | 616        | 1.00 |           | 241          | 1.00 |           |
| Cohabiting+children                                         | 9893       | 1.31 | 1.21 1.42 | 3954         | 1.39 | 1.22 1.58 |
| Lone+no children                                            | 5945       | 1.10 | 1.01 1.19 | 3070         | 1.89 | 1.66 2.16 |
| Lone+children                                               | 3716       | 2.35 | 2.16 2.57 | 2333         | 2.45 | 2.15 2.80 |
| Family structure <sup>b</sup>                               |            |      |           |              |      |           |
| Total                                                       | 20057      |      |           | 9598         |      |           |
| Cohabiting+no children                                      | 615        | 1.00 |           | 241          | 1.00 |           |
| Cohabiting+children                                         | 9804       | 1.13 | 1.04 1.23 | 3954         | 1.09 | 0.95 1.24 |
| Lone+no children                                            | 5938       | 1.07 | 0.98 1.16 | 3070         | 1.44 | 1.26 1.65 |
| Lone+children                                               | 3700       | 1.69 | 1.55 1.85 | 2333         | 1.62 | 1.41 1.85 |
| <b>Five-year follow up "Healthy" at start of follow up:</b> |            |      |           |              |      |           |
| Family structure <sup>b</sup>                               |            |      |           |              |      |           |
| Total                                                       | 6705       |      |           | 3871         |      |           |
| Cohabiting+no children                                      | 215        | 1.00 |           | 117          | 1.00 |           |
| Cohabiting+children                                         | 2778       | 1.24 | 1.08 1.43 | 1447         | 1.18 | 0.97 1.42 |
| Lone+no children                                            | 2618       | 1.23 | 1.07 1.42 | 1467         | 1.83 | 1.51 2.22 |
| Lone+children                                               | 1094       | 1.91 | 1.64 2.22 | 840          | 1.94 | 1.59 2.36 |

1  
2  
3  
4  
5  
6  
7  
8  
9  
10  
11  
12  
13  
14  
15  
16  
17  
18  
19  
20  
21  
22  
23  
24  
25  
26  
27  
28  
29  
30  
31  
32  
33  
34  
35  
36  
37  
38  
39  
40  
41  
42  
43  
44  
45  
46  
47  
48  
49  
50  
51  
52  
53  
54  
55  
56  
57  
58  
59  
60

a Adjusted for age.

b The model for employed included age, residential area, country of birth, education, income, employment sector, and days of unemployment. The model for not employed included age, residential area, country of birth, and education.

For peer review only

**REFERENCES**

1. OECD. *Sickness, Disability and Work: Breaking the Barriers - Vol. 3: Denmark, Finland, Ireland and the Netherlands*. OECD, Paris 2008.
2. OECD. *Sickness, Disability and Work: Breaking the Barriers - Sweden: Will the recent reforms make it?* OECD, Paris 2009.
3. OECD. *Sickness, Disability and Work: Breaking the Barriers - A Synthesis of Findings across OECD Countries*, OECD, Paris 2010.
4. Försäkringskassan (The Swedish Social Insurance Agency). *Diagnosmönster i förändring - nybeviljade förtidspensioner, sjukersättningar och aktivitetsersättningar 1971 - 2005*. [Changing Diagnostic Patterns – Newly Granted Disability Pensions, Sickness and Rehabilitation Allowances 1971–2005 ] Försäkringskassan Redovisar 2007:3, Stockholm 2007. (In Swedish)
5. Försäkringskassan (The Swedish Social Insurance Agency). *Social insurance in figures 2008*. Försäkringskassan 2009, Stockholm 2009.
6. Bjørngaard JH, Krokstad S, Johnsen R et al. Epidemiologisk forskning om uførepensjon i Norden.[Epidemiological Research on Disability Pensions in the Nordic Countries] Norsk Epidemiologi 2009;19:103-114. (Review in Norwegian)
7. Thorlacius S, Stefánsson SB, Olafsson S et al. Increased incidence of disability due to mental and behavioural disorders in Iceland 1990-2007. *J Mental Health* 2010;19(2):176-183.
8. Gjesdal S, Lie RT, Maeland JG. Variations in the risk of disability pension in Norway 1970-99. A gender-specific age-period-cohort analysis. *Scand J Public Health* 2004;32(5):340-348.
9. Artazcoz L, Artieda L, Borrell C, et al. Combining job and family demands and being healthy: what are the differences between men and women? *Eur J Public Health*. 2004 Mar;14(1):43-8.
10. Väänänen A, Kevin MV, Ala-Mursula L, et al. The double burden of and negative spillover between paid and domestic work: associations with health among men and women. *Women Health*. 2004;40(3):1-18.
11. Emslie C, Hunt K, Macintyre S. Gender, work-home conflict, and morbidity amongst white-collar bank employees in the United Kingdom. *Int J Behav Med*. 2004;11(3):127-34

12. Hewitt B, Baxter J, Western M. Family, work and health - The impact of marriage, parenthood and employment on self-reported health of Australian men and women. *Journal of sociology* 2006;42:61-78.
13. Harkonmäki K, Rahkonen O, Martikainen P, et al. Associations of SF-36 mental health functioning and work and family related factors with intentions to retire early among employees. *Occup Environ Med*. 2006 Aug;63(8):558-63. Epub 2006 Apr 6.
14. Mastekaasa A. Parenthood, gender and sickness absence. *Soc Sci Med* 2000;50:1827-42. .
15. Voss M, Josephson M, Stark S, et al. The influence of household work and of having children on sickness absence among publicly employed women in Sweden. *Scand J Public Health*. 2008 Aug;36(6):564-72.
16. Samuelsson A, Alexanderson K, Ropponen A, et al. Incidence of disability pension and associations with socio-demographic factors in a Swedish twin cohort. *Soc Psychiatry Psychiatr Epidemiol*. 2012 Mar 20. [Epub ahead of print]
17. Gjesdal S, Bratberg E. The role of gender in long-term sickness absence and transition to permanent disability benefits. Results from a multiregister based, prospective study in Norway 1990-1995. *Eur J Public Health*. 2002 Sep;12(3):180-6.
18. Gjesdal S, Bratberg E. Diagnosis and duration of sickness absence as predictors for disability pension: results from a three-year, multi-register based\* and prospective study. *Scand J Public Health*. 2003;31(4):246-54.
19. Gjesdal S, Ringdal PR, Haug K, et al. Predictors of disability pension in long-term sickness absence: results from a population-based and prospective study in Norway 1994-1999. *Eur J Public Health*. 2004 Dec;14(4):398-405
20. Karlsson NE, Carstensen JM, Gjesdal S, et al. Risk factors for disability pension in a population-based cohort of men and women on long-term sick leave in Sweden. *Eur J Public Health*. 2008 Jun;18(3):224-31. Epub 2008 Feb 1.
21. Floderus B, Hagman M, Aronsson G et al. Self-reported health in mothers: the impact of age, and socioeconomic conditions. *Women Health* 2008;47(2):63-8622.
22. Floderus B, Hagman M, Aronsson G et al. Work status, work hours and health in women with and without children. *Occup Environ Med* 2009;66(10):704-710.

23. Floderus B, Hagman M, Aronsson G et al. Medically certified sickness absence with insurance benefits in women with and without children. *Eur J Public Health* 2011 (open access publication).
24. Hertzmark E, Spiegelman D. *The SAS MPHREG macro*. Boston, MA: Channing Laboratory, 2001.
25. Wise LA, Palmer JR, Harlow BL et al. Reproductive factors, hormonal contraception, and risk of uterine leiomyomata in African-American women: A prospective study. *Am J Epidemiol* 2004;159:113-123.
26. Boynton-Jarrett R, Rich-Edwards J, Malspeis S et al. A prospective study of hypertension and risk of uterine leiomyomata. *Am J Epidemiol* 2005; 161:628-638.
27. Willett JB, Singer JD, Martin NC. The design and analysis of longitudinal studies of development and psychopathology in context: Statistical models and methodological recommendations. *Development and psychopathology* 1998; 10:395-426.
28. Benzeval M. The self-reported health status of lone parents. *Soc Sci Med* 1998;46(10):1337-1353
29. Burstrom B, Whitehead M, Clayton S et al. Health inequalities between lone and couple mothers and policy under different welfare regimes - The example of Italy, Sweden and Britain. *Soc Sci Med* 2010;70:912-920.
30. Gravseth HM, Bjerkedal T, Irgens LM et al. Life course determinants for early disability pension: a follow-up of Norwegian men and women born 1967-1976. *Eur J Epidemiol* 2007;22:533-543.
31. Upmark M, Thundal KL. An explorative, population-based study of female disability pensioners: the role of childhood conditions and alcohol abuse/dependence. *Scand J Public Health*. 2002;30(3):191-932.
32. Harkonmäki K, Korkeila K, Vahtera J, et al. Childhood adversities as a predictor of disability retirement. *J Epidemiol Community Health*. 2007 Jun;61(6):479-84.
33. Allebeck P, Mastekaasa A Swedish Council on Technology Assessment in Health Care (SBU). Chapter 5. Risk factors for sick leave - general studies. *Scand J Public Health Suppl*. 2004;63:49-108. Review.

1  
2  
3  
4  
5  
6  
7  
8  
9  
10  
11  
12  
13  
14  
15  
16  
17  
18  
19  
20  
21  
22  
23  
24  
25  
26  
27  
28  
29  
30  
31  
32  
33  
34  
35  
36  
37  
38  
39  
40  
41  
42  
43  
44  
45  
46  
47  
48  
49  
50  
51  
52  
53  
54  
55  
56  
57  
58  
59  
60

## STROBE Statement—checklist of items that should be included in reports of observational studies

|                              | Item No | Recommendation                                                                                                                                                                                                                                                                                                                                                                                                                                                                                                                                                                                                                                                                                   |
|------------------------------|---------|--------------------------------------------------------------------------------------------------------------------------------------------------------------------------------------------------------------------------------------------------------------------------------------------------------------------------------------------------------------------------------------------------------------------------------------------------------------------------------------------------------------------------------------------------------------------------------------------------------------------------------------------------------------------------------------------------|
| <b>Title and abstract</b>    | 1       | (a) Indicate the study's design with a commonly used term in the title or the abstract<br>(b) Provide in the abstract an informative and balanced summary of what was done and what was found                                                                                                                                                                                                                                                                                                                                                                                                                                                                                                    |
| <b>Introduction</b>          |         |                                                                                                                                                                                                                                                                                                                                                                                                                                                                                                                                                                                                                                                                                                  |
| Background/rationale         | 2       | Explain the scientific background and rationale for the investigation being reported                                                                                                                                                                                                                                                                                                                                                                                                                                                                                                                                                                                                             |
| Objectives                   | 3       | State specific objectives, including any prespecified hypotheses                                                                                                                                                                                                                                                                                                                                                                                                                                                                                                                                                                                                                                 |
| <b>Methods</b>               |         |                                                                                                                                                                                                                                                                                                                                                                                                                                                                                                                                                                                                                                                                                                  |
| Study design                 | 4       | Present key elements of study design early in the paper                                                                                                                                                                                                                                                                                                                                                                                                                                                                                                                                                                                                                                          |
| Setting                      | 5       | Describe the setting, locations, and relevant dates, including periods of recruitment, exposure, follow-up, and data collection                                                                                                                                                                                                                                                                                                                                                                                                                                                                                                                                                                  |
| Participants                 | 6       | (a) <i>Cohort study</i> —Give the eligibility criteria, and the sources and methods of selection of participants. Describe methods of follow-up<br><i>Case-control study</i> —Give the eligibility criteria, and the sources and methods of case ascertainment and control selection. Give the rationale for the choice of cases and controls<br><i>Cross-sectional study</i> —Give the eligibility criteria, and the sources and methods of selection of participants<br>(b) <i>Cohort study</i> —For matched studies, give matching criteria and number of exposed and unexposed<br><i>Case-control study</i> —For matched studies, give matching criteria and the number of controls per case |
| Variables                    | 7       | Clearly define all outcomes, exposures, predictors, potential confounders, and effect modifiers. Give diagnostic criteria, if applicable                                                                                                                                                                                                                                                                                                                                                                                                                                                                                                                                                         |
| Data sources/<br>measurement | 8*      | For each variable of interest, give sources of data and details of methods of assessment (measurement). Describe comparability of assessment methods if there is more than one group                                                                                                                                                                                                                                                                                                                                                                                                                                                                                                             |
| Bias                         | 9       | Describe any efforts to address potential sources of bias                                                                                                                                                                                                                                                                                                                                                                                                                                                                                                                                                                                                                                        |
| Study size                   | 10      | Explain how the study size was arrived at                                                                                                                                                                                                                                                                                                                                                                                                                                                                                                                                                                                                                                                        |
| Quantitative variables       | 11      | Explain how quantitative variables were handled in the analyses. If applicable, describe which groupings were chosen and why                                                                                                                                                                                                                                                                                                                                                                                                                                                                                                                                                                     |
| Statistical methods          | 12      | (a) Describe all statistical methods, including those used to control for confounding<br>(b) Describe any methods used to examine subgroups and interactions<br>(c) Explain how missing data were addressed<br>(d) <i>Cohort study</i> —If applicable, explain how loss to follow-up was addressed<br><i>Case-control study</i> —If applicable, explain how matching of cases and controls was addressed<br><i>Cross-sectional study</i> —If applicable, describe analytical methods taking account of sampling strategy<br>(e) Describe any sensitivity analyses                                                                                                                                |

Continued on next page



1  
2  
3  
4  
5  
6  
7  
8  
9  
10  
11  
12  
13  
14  
15  
16  
17  
18  
19  
20  
21  
22  
23  
24  
25  
26  
27  
28  
29  
30  
31  
32  
33  
34  
35  
36  
37  
38  
39  
40  
41  
42  
43  
44  
45  
46  
47  
48  
49  
50  
51  
52  
53  
54  
55  
56  
57  
58  
59  
60**Results**

|                  |     |                                                                                                                                                                                                                                                                                                                                                                                                               |
|------------------|-----|---------------------------------------------------------------------------------------------------------------------------------------------------------------------------------------------------------------------------------------------------------------------------------------------------------------------------------------------------------------------------------------------------------------|
| Participants     | 13* | (a) Report numbers of individuals at each stage of study—eg numbers potentially eligible, examined for eligibility, confirmed eligible, included in the study, completing follow-up, and analysed<br>(b) Give reasons for non-participation at each stage<br>(c) Consider use of a flow diagram                                                                                                               |
| Descriptive data | 14* | (a) Give characteristics of study participants (eg demographic, clinical, social) and information on exposures and potential confounders<br>(b) Indicate number of participants with missing data for each variable of interest<br>(c) <i>Cohort study</i> —Summarise follow-up time (eg, average and total amount)                                                                                           |
| Outcome data     | 15* | <i>Cohort study</i> —Report numbers of outcome events or summary measures over time<br><i>Case-control study</i> —Report numbers in each exposure category, or summary measures of exposure<br><i>Cross-sectional study</i> —Report numbers of outcome events or summary measures                                                                                                                             |
| Main results     | 16  | (a) Give unadjusted estimates and, if applicable, confounder-adjusted estimates and their precision (eg, 95% confidence interval). Make clear which confounders were adjusted for and why they were included<br>(b) Report category boundaries when continuous variables were categorized<br>(c) If relevant, consider translating estimates of relative risk into absolute risk for a meaningful time period |
| Other analyses   | 17  | Report other analyses done—eg analyses of subgroups and interactions, and sensitivity analyses                                                                                                                                                                                                                                                                                                                |

**Discussion**

|                  |    |                                                                                                                                                                            |
|------------------|----|----------------------------------------------------------------------------------------------------------------------------------------------------------------------------|
| Key results      | 18 | Summarise key results with reference to study objectives                                                                                                                   |
| Limitations      | 19 | Discuss limitations of the study, taking into account sources of potential bias or imprecision. Discuss both direction and magnitude of any potential bias                 |
| Interpretation   | 20 | Give a cautious overall interpretation of results considering objectives, limitations, multiplicity of analyses, results from similar studies, and other relevant evidence |
| Generalisability | 21 | Discuss the generalisability (external validity) of the study results                                                                                                      |

**Other information**

|         |    |                                                                                                                                                               |
|---------|----|---------------------------------------------------------------------------------------------------------------------------------------------------------------|
| Funding | 22 | Give the source of funding and the role of the funders for the present study and, if applicable, for the original study on which the present article is based |
|---------|----|---------------------------------------------------------------------------------------------------------------------------------------------------------------|

\*Give information separately for cases and controls in case-control studies and, if applicable, for exposed and unexposed groups in cohort and cross-sectional studies.

**Note:** An Explanation and Elaboration article discusses each checklist item and gives methodological background and published examples of transparent reporting. The STROBE checklist is best used in conjunction with this article (freely available on the Web sites of PLoS Medicine at <http://www.plosmedicine.org/>, Annals of Internal Medicine at <http://www.annals.org/>, and Epidemiology at <http://www.epidem.com/>). Information on the STROBE Initiative is available at [www.strobe-statement.org](http://www.strobe-statement.org).

1  
2  
3  
4  
5  
6  
7  
8  
9  
10  
11  
12  
13  
14  
15  
16  
17  
18  
19  
20  
21  
22  
23  
24  
25  
26  
27  
28  
29  
30  
31  
32  
33  
34  
35  
36  
37  
38  
39  
40  
41  
42  
43  
44  
45  
46  
47  
48  
49

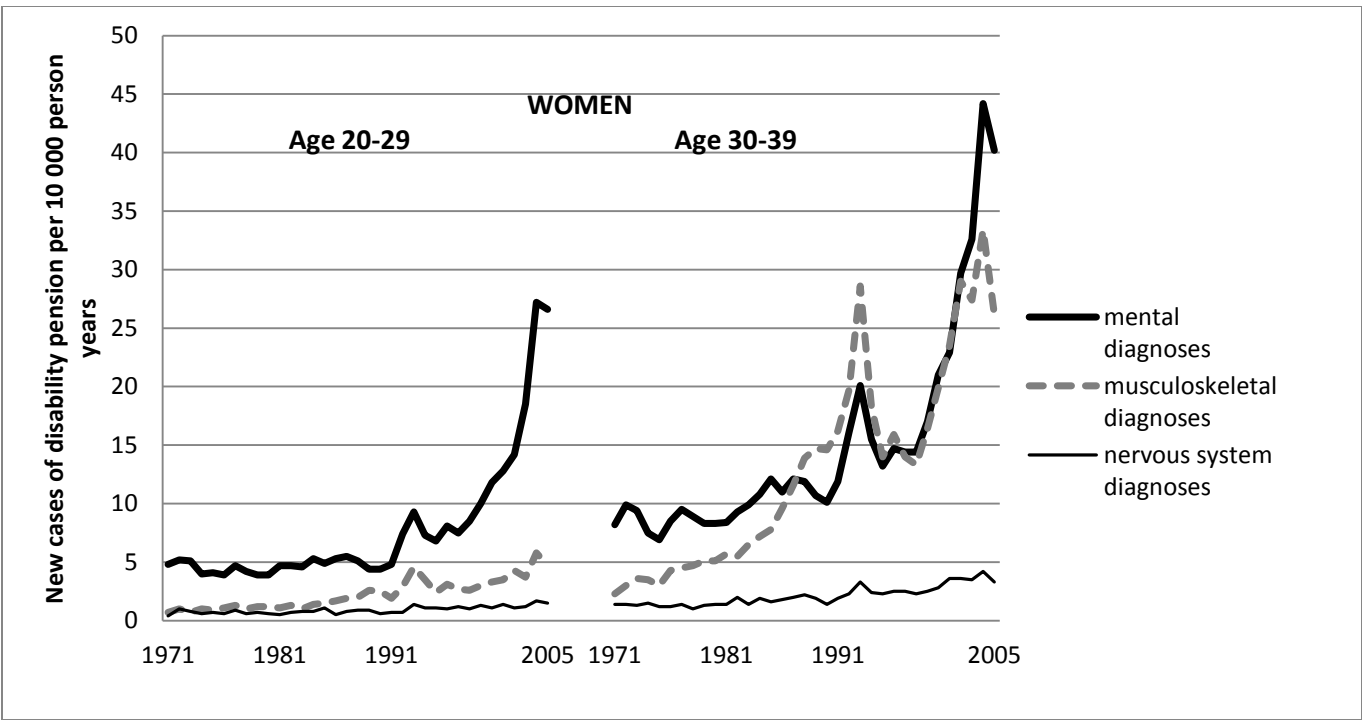

Figure 1. New cases of disability pension among women 20-29 and 30-39 years of age, due to mental diagnoses (ICD-10: F00-F99), musculoskeletal diagnoses (ICD-10: M00-M99), and diagnoses of the nervous system (ICD-10: G00-G99). Sweden 1971-2005. Data source: The Swedish Social Insurance Agency (reference 4). (Differences in ICD coding during the time period were harmonized).

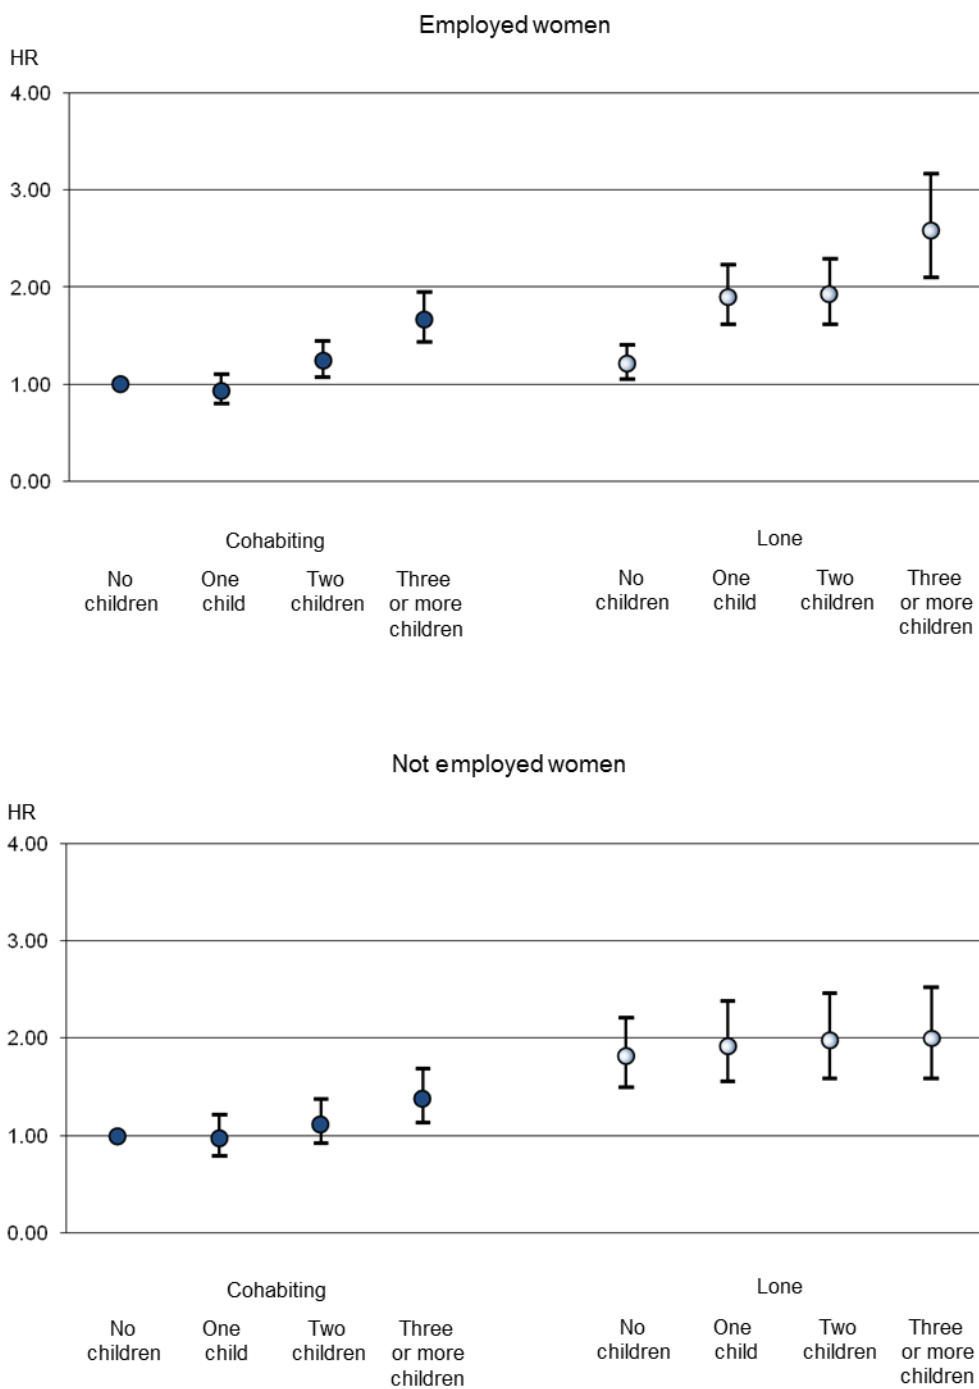

Figure 2. Hazard ratios of DP according to family structure among employed and not employed young women: a five-year follow up based on women with no sickness absence during the three years before exposure assessment, and with control for potential confounders.
